# Supplementary material for: Smart mechanochemistry: optimizing amino acid acylation with one factor at a time, design of experiments and machine learning methods
Source: Royal Society of Chemistry journal article supplement (doi:10.1039/d5mr00096c), 2025-11-28
Supplement: d5mr00096c1.pdf [file d5mr00096c1.pdf]

## Supplementary Information

### **Smart Mechanochemistry: Optimizing Amino Acid Acylation with One Factor at a Time, Design of Experiments and Machine Learning Methods**

Adrien Gallego,<sup>a,b</sup> Matthieu Lavayssiere,<sup>a</sup> Xavier Bantreil,<sup>a,c</sup> Nicolas Pétry,<sup>a</sup> Julien Pinaud,<sup>b</sup> Olivia Giani<sup>\*b</sup> and Frédéric Lamaty<sup>\*a</sup>

<sup>a</sup> IBMM, CNRS, ENSCM, Université de Montpellier, France

<sup>b</sup> ICGM, CNRS, ENSCM, Université de Montpellier, France

<sup>c</sup> Institut Universitaire de France (IUF)

\* [olivia.giani@umontpellier.fr](mailto:olivia.giani@umontpellier.fr)  
[frederic.lamaty@umontpellier.fr](mailto:frederic.lamaty@umontpellier.fr)

## Table des matières

|                                                                                                                            |    |
|----------------------------------------------------------------------------------------------------------------------------|----|
| <i>General information</i> .....                                                                                           | 3  |
| <i>Determination of the NMR adjusted yield</i> .....                                                                       | 4  |
| <i>Design of Experiments</i> .....                                                                                         | 5  |
| First DoE .....                                                                                                            | 6  |
| Second DoE .....                                                                                                           | 6  |
| DoE including OFAT results .....                                                                                           | 9  |
| <i>Implemented Bayesian optimization</i> .....                                                                             | 10 |
| General information for the Bayesian optimization .....                                                                    | 10 |
| Data preparation .....                                                                                                     | 10 |
| Surrogate model generation .....                                                                                           | 11 |
| Identify the most informative experimental conditions.....                                                                 | 11 |
| Minimizing overlap between the explored conditions .....                                                                   | 14 |
| Improved stabilization of the surrogate .....                                                                              | 14 |
| <i>Experimental assays for Bayesian optimization</i> .....                                                                 | 17 |
| Acylation of <i>L</i> -Leucine 1a .....                                                                                    | 17 |
| Simple BO .....                                                                                                            | 17 |
| Combination of OFAT/DoE and BO .....                                                                                       | 25 |
| Acylation of <i>L</i> -Phenylalanine 1b .....                                                                              | 28 |
| <i>Experimental procedures and product characterizations</i> .....                                                         | 30 |
| N-(2-chloroacetyl)- <i>L</i> -Leucine [688-12-0] .....                                                                     | 30 |
| N-(2-chloroacetyl)- <i>L</i> -phenylalanine [721-65-3] .....                                                               | 31 |
| <i>O</i> -benzyl- <i>N</i> -(2-chloroacetyl)- <i>L</i> -serine [3062-02-0] .....                                           | 31 |
| <i>N</i> <sup>6</sup> -((benzyloxy)carbonyl)- <i>N</i> <sup>2</sup> -(2-chloroacetyl)- <i>L</i> -lysine [47376-73-8] ..... | 32 |
| (S)-3-(4-(tert-butoxy)phenyl)-2-(2-chloroacetamido)propanoic acid .....                                                    | 32 |
| (2-chloroacetyl)- <i>L</i> -methionine [57230-01-0] .....                                                                  | 33 |
| (2-chloroacetyl)- <i>L</i> -proline [23500-10-9] .....                                                                     | 33 |
| <i><sup>1</sup>H and <sup>13</sup>C NMR spectra</i> .....                                                                  | 35 |
| N-(2-chloroacetyl)- <i>L</i> -Leucine [688-12-0] .....                                                                     | 35 |
| N-(2-chloroacetyl)- <i>L</i> -phenylalanine [721-65-3] .....                                                               | 36 |
| <i>O</i> -benzyl- <i>N</i> -(2-chloroacetyl)- <i>L</i> -serine [3062-02-0] .....                                           | 37 |
| <i>N</i> <sup>6</sup> -((benzyloxy)carbonyl)- <i>N</i> <sup>2</sup> -(2-chloroacetyl)- <i>L</i> -lysine [47376-73-8] ..... | 38 |
| (S)-3-(4-(tert-butoxy)phenyl)-2-(2-chloroacetamido)propanoic acid .....                                                    | 39 |
| (2-chloroacetyl)- <i>L</i> -methionine [57230-01-0] .....                                                                  | 40 |

|                                                        |    |
|--------------------------------------------------------|----|
| (2-chloroacetyl)- <i>L</i> -proline [23500-10-9] ..... | 41 |
| <b>References</b> .....                                | 42 |

## General information

All reagents were purchased from Sigma Aldrich or BLD Pharmatech and used without further purification.

The milling experiments were carried out in a vibrating Retsch Mixer Mill 400 operated at 30 Hz. Milling load is defined as the ratio between the mass of reactant over the free volume of the jar.

NMR analyses were performed at the UAR PAC Balard. <sup>1</sup>H NMR spectra were recorded on a Bruker AVANCE 400 MHz or 500 MHz and are reported in ppm using deuterated solvents (CDCl<sub>3</sub> at 7.26 ppm and DMSO-*d*<sub>6</sub> at 2.50 ppm) purchased from Cambridge Isotopes Laboratories (Eurisotop). Data are reported as s = singlet, br. s = broad singlet, d = doublet, t = triplet, dd = doublet doublet, m = multiplet, coupling constant in Hz, integration. <sup>13</sup>C NMR spectra were recorded on a Bruker AVANCE 101 MHz or 126 MHz spectrometer and are reported in ppm using solvent as an internal standard (CDCl<sub>3</sub> at 77.16 ppm and DMSO-*d*<sub>6</sub> at 39.52 ppm).

HPLC conversion was measured on a ThermoFischer Vanquish Core LC using a Chromolith® HighResolution RP-18 endcapped 50-4.6 mm column and a linear gradient of 0 to 100% CH<sub>3</sub>CN/0.1% TFA in H<sub>2</sub>O/0.1% TFA over 3 min, UV lamp detection at 214 nm. Flow rate: 3 mL/min. To monitor reactions in a ball-mill, a sample was taken from milling jar, dissolved in 1 mL of a mixture CH<sub>3</sub>CN/H<sub>2</sub>O and submitted to HPLC analysis.

HRMS analyses were performed on UPLC Acquity H-Class from Waters hyphenated to a Q-ToF mass spectrometer (Synapt G2-S from Waters) with a dual ESI source.

Melting points were measured on an Auto Melting Point Apparatus (MP120) from Hanon Instruments.

DoE was performed through the Ellistat software (version 7.8.7 2024/03), available at <https://www.ellistat.com>

Regarding the reaction time, the values indicated by the DoE and BO were rounded to the nearest 5 minutes for experimental considerations.

The NMR adjusted yield values are reported as: mean value of several experiments ± 1.96\*standard error (corresponding to a 95% confidence interval).

## Determination of the NMR adjusted yield

In this part, the reaction described on Scheme 1 is considered. After completion of the milling, the reaction media is portioned in between ethyl acetate and a 1M HCl aqueous solution. The

aqueous phase is extracted with ethyl acetate. The organic phases are combined, dried over Na<sub>2</sub>SO<sub>4</sub> and concentrated under reduced pressure.

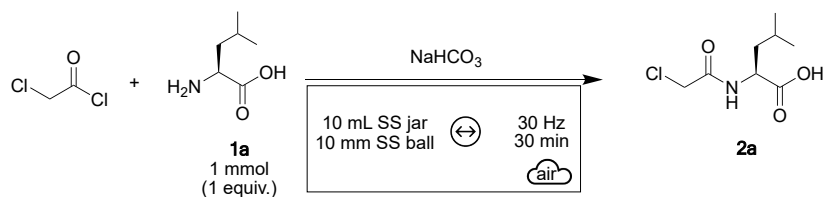

Scheme 1 - Acylation of L-Leucine **1a** under mechanochemical conditions

A <sup>1</sup>H NMR analysis is performed on the crude whose mass is m<sub>tot</sub> = 246 mg.

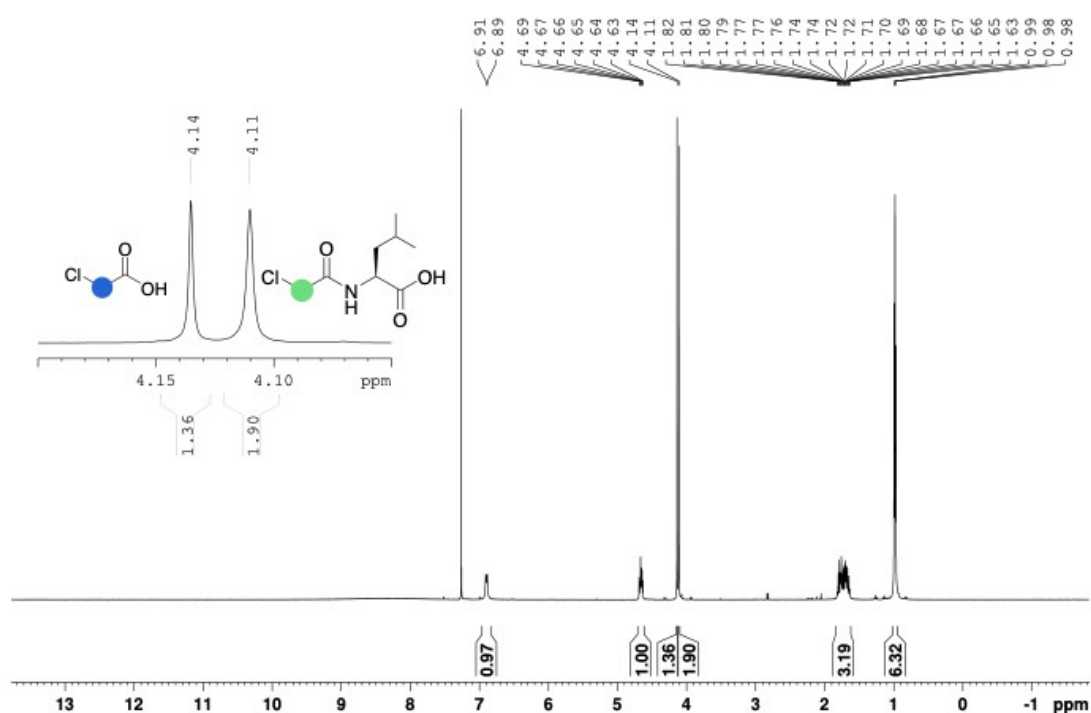

Figure 1 - <sup>1</sup>H NMR spectrum of the crude product

The NMR spectrum reveals a peak at 4.14 ppm, corresponding to the -CH<sub>2</sub> of chloroacetic acid. The proportion of desired product in the crude could be estimated thanks to the following equation.

$$m_{\text{product}} = \frac{\frac{\text{Integration}}{\text{Number of protons}} \times MW_{\text{product}}}{\frac{\text{Integration}}{\text{Number of protons}} \times MW_{\text{product}} + \frac{\text{Integration}}{\text{Number of protons of impurity}} \times MW_{\text{impurity}}} \times m_{\text{tot}}$$

In this case:

$$m_{product} = \frac{\frac{1.90}{2} \times 207.65}{\frac{1.90}{2} \times 207.65 + \frac{1.36}{2} \times 94.5} \times 246 \approx 186 \text{ mg}$$

The NMR adjusted yield can therefore be calculated:

$$\text{NMR adjusted yield} = \frac{m_{product}}{MW_{product}} \times \frac{1}{n_{H-Leu-OH}} = \frac{186}{207.65} \times \frac{1}{1} = 89\%$$

## Design of Experiments

Response Surface Methodology (RSM) utilizing a Composite Face-centered (CCF) design was applied to evaluate the influence of three critical variables – chloroacetyl chloride quantity,  $\text{NaHCO}_3$  quantity and milling time – on the NMR-adjusted yield of the acylation reaction.

The CCF design enables systematic exploration of the experimental space through three distinct types of design points:

- Factorial points**, representing combinations of variables at low (-1) and high (+1) levels, which define the edges of the experimental cube
- Axial points**, positioned at the center of each cube face ( $\alpha = \pm 1$ )
- Center points**, located at the midpoint of all factors, used to assess experimental error and model stability

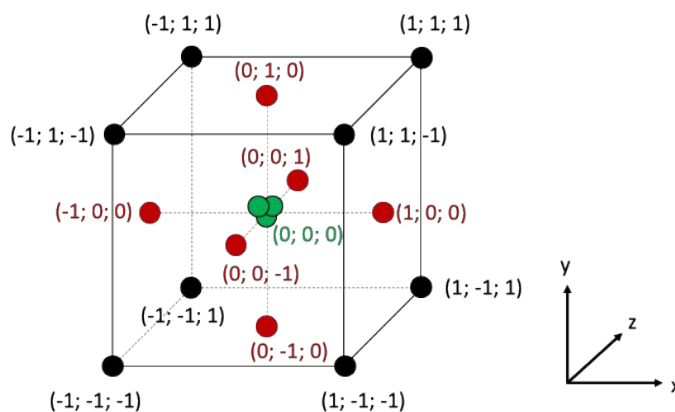

Figure 2 - Composite face-centered design

In the following tables, several statistical parameters are reported:

- Student's **t** parameter, used to assess whether the difference between means is statistically significant;
- Fischer's **F** parameter, used to compare two variances or to test whether a group of variables significantly explains the variation in a model;
- p-value**, interpreted as the probability of obtaining the observed results, or more extreme ones, if the null hypothesis were true. A small p-value suggests the effect is statistically significant.

## First DoE

At the beginning, unsuitable ranges of variations were set leading to surface response showed in Figure 3. The best value is reached at the edges of the reaction space. As the optimum is not clearly defined, an extension of the reaction space was necessary.

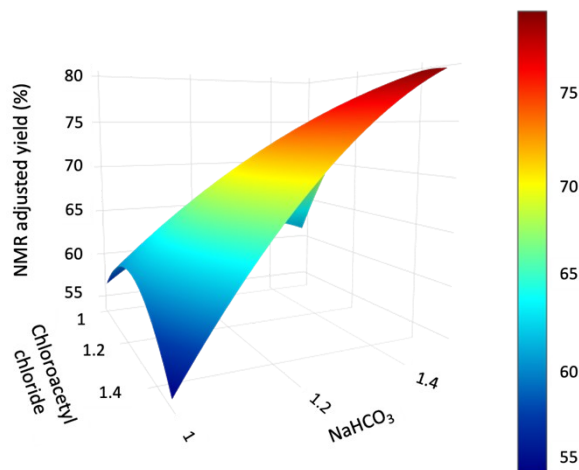

Figure 3 - Correlation between amount of chloroacetyl chloride, amount of NaHCO<sub>3</sub> and NMR adjusted yield with reaction time fixed at 30 min

## Second DoE

The experimental data related to this DoE is reported in Table 1.

Table 1 - Experimental data, including replicates, used in the DoE

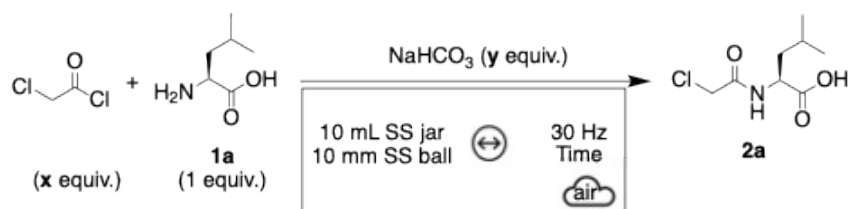

| Entry | x (equiv.) | y (equiv.) | Reaction time (min) | NMR adjusted yield (%) |
|-------|------------|------------|---------------------|------------------------|
| 1     | 1          | 1          | 5                   | 50                     |
| 2     | 1          | 1          | 5                   | 50                     |
| 3     | 1          | 1          | 5                   | 56                     |
| 4     | 1          | 1          | 60                  | 65                     |
| 5     | 1          | 1          | 60                  | 55                     |
| 6     | 1          | 1          | 60                  | 56                     |
| 7     | 1          | 4          | 5                   | 55                     |
| 8     | 1          | 4          | 5                   | 51                     |
| 9     | 1          | 4          | 60                  | 60                     |
| 10    | 1          | 4          | 60                  | 61                     |

|    |     |   |    |     |
|----|-----|---|----|-----|
| 11 | 2   | 1 | 5  | 62  |
| 12 | 2   | 1 | 60 | 66  |
| 13 | 2   | 4 | 5  | 65  |
| 14 | 2   | 4 | 5  | 90  |
| 15 | 2   | 4 | 60 | 82  |
| 16 | 2   | 4 | 60 | 83  |
| 17 | 1.5 | 2 | 30 | 91  |
| 18 | 1.5 | 2 | 30 | 90  |
| 19 | 1.5 | 2 | 30 | 90  |
| 20 | 1.5 | 2 | 30 | 94  |
| 21 | 1.5 | 2 | 30 | 88  |
| 22 | 1   | 2 | 30 | 56  |
| 23 | 1   | 2 | 30 | 56  |
| 24 | 2   | 2 | 30 | 89  |
| 25 | 2   | 2 | 30 | 85  |
| 26 | 1.5 | 1 | 30 | 68  |
| 27 | 1.5 | 4 | 30 | 86  |
| 28 | 1.5 | 4 | 30 | 100 |
| 29 | 1.5 | 2 | 5  | 93  |
| 30 | 1.5 | 2 | 5  | 87  |
| 31 | 1.5 | 2 | 60 | 81  |
| 32 | 1.5 | 2 | 60 | 84  |

According to the experimental results, the following mathematical model was established:

*Equation 1 - Quadratic model*

$$Y = b_0 + b_1X_1 + b_2X_2 + b_3X_3 + b_{11}X_1^2 + b_{22}X_2^2 + b_{33}X_3^2 + b_{12}X_1X_2 + b_{13}X_1X_3 + b_{23}X_2X_3$$

Where:

- Y is the response i.e., NMR adjusted yield;
- $X_1$ ,  $X_2$  and  $X_3$  are the coded levels for the variables, respectively amount of chloroacetyl chloride,  $\text{NaHCO}_3$  quantity and milling time;
- $b_0$  is a constant coefficient;
- $b_1$ ,  $b_2$  and  $b_3$  are the coefficient for the linear effects;
- $b_{11}$ ,  $b_{22}$  and  $b_{33}$  are the coefficient for the quadratic effects;
- $b_{12}$ ,  $b_{13}$  and  $b_{23}$  are the coefficient for the interaction effects.

The values of the coefficients are reported in Table 2.

*Table 2 - Values for regression coefficient for the response surface quadratic model defined by Eq. 1*

| Coefficient | Value | Standard error | t-value | p-value <sup>a</sup> |
|-------------|-------|----------------|---------|----------------------|
|-------------|-------|----------------|---------|----------------------|

|          |             |          |        |       |
|----------|-------------|----------|--------|-------|
| $b_0$    | -114.714    | 25.65    | -4.473 | 0.000 |
| $b_1$    | 218.052     | 38.7     | 5.635  | 0.000 |
| $b_2$    | 14.2162     | 9.34     | 1.522  | 0.142 |
| $b_3$    | 0.372565    | 0.343    | 1.086  | 0.289 |
| $b_{11}$ | -68.788     | 12.72    | -5.408 | 0.000 |
| $b_{22}$ | -3.54584    | 1.721    | -2.060 | 0.051 |
| $b_{33}$ | -0.00341554 | 0.004244 | -0.805 | 0.430 |
| $b_{12}$ | 4.2091      | 2.468    | 1.706  | 0.102 |
| $b_{13}$ | -0.0922225  | 0.1356   | -0.680 | 0.504 |
| $b_{23}$ | 0.0168229   | 0.04359  | 0.386  | 0.703 |

<sup>a</sup> Significant if p-value < 0.05

An analysis of variance was also performed.

*Table 3 - Analysis of variance for the response surface quadratic model*

| Source    | Degree of freedom | Mean square | F-value | p-value <sup>a</sup> |
|-----------|-------------------|-------------|---------|----------------------|
| $X_1$     | 1                 | 1586.6      | 31.7484 | 0.0000               |
| $X_2$     | 1                 | 115.79      | 2.3168  | 0.1422               |
| $X_3$     | 1                 | 58.977      | 1.1801  | 0.2891               |
| $X_1^2$   | 1                 | 1461.5      | 29.2434 | 0.0000               |
| $X_2^2$   | 1                 | 212.15      | 4.2450  | 0.0514               |
| $X_3^2$   | 1                 | 32.364      | 0.6476  | 0.4296               |
| $X_1 X_2$ | 1                 | 145.4       | 2.9095  | 0.1021               |
| $X_1 X_3$ | 1                 | 23.111      | 0.4625  | 0.5036               |
| $X_2 X_3$ | 1                 | 7.4448      | 0.1490  | 0.7032               |
| Residual  | 9                 | 49.976      |         |                      |

<sup>a</sup> Significant if p-value < 0.05



## DoE including OFAT results

The corresponding Response Surface is shown in Figure 4.

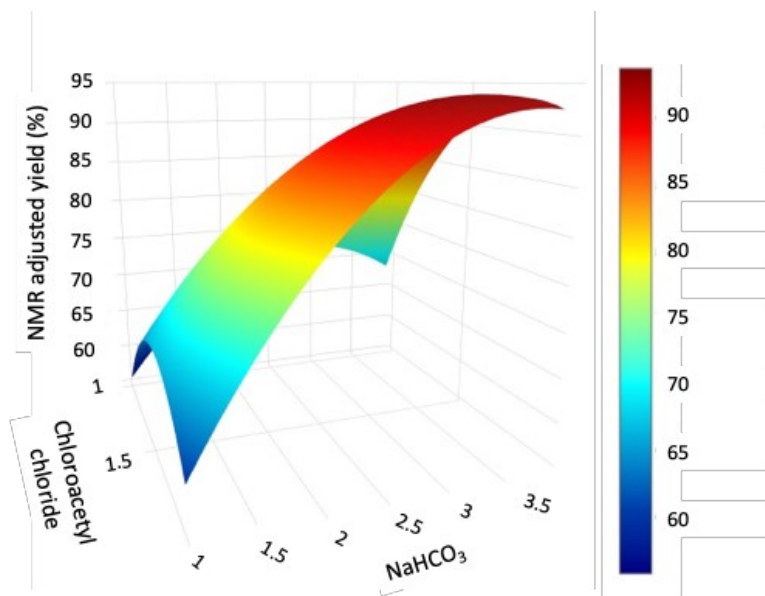

Figure 4 - Correlation between amount of chloroacetyl chloride, amount of  $\text{NaHCO}_3$  and NMR adjusted yield with reaction time fixed at 30 min for the set OFAT + DoE

By implementing the results of the experiments performed in the OFAT section, a new mathematical model was established:

$$Y = b'_0 + b'_1X'_1 + b'_2X'_2 + b'_3X'_3 + b'_{11}X'^2_1 + b'_{22}X'^2_2 + b'_{33}X'^2_3 + b'_{12}X'_1X'_2 + b'_{13}X'_1X'_3 + b'_{23}X'_2X'_3$$

Table 4 - Values of coefficients of the model for the DoE including the OFAT data

| Coefficient | Value       | Standard error | t-value | p-value <sup>a</sup> |
|-------------|-------------|----------------|---------|----------------------|
| $b'_0$      | -55.1263    | 14.8           | -3.726  | 0.000                |
| $b'_1$      | 125.7650    | 18.99          | 6.623   | 0.000                |
| $b'_2$      | 15.8624     | 6.049          | 2.622   | 0.011                |
| $b'_3$      | 0.393205    | 0.2112         | 1.862   | 0.067                |
| $b'_{11}$   | -39.9022    | 6.521          | -6.119  | 0.000                |
| $b'_{22}$   | -4.33298    | 1.061          | -4.085  | 0.000                |
| $b'_{33}$   | -0.00407138 | 0.002621       | -1.553  | 0.125                |
| $b'_{12}$   | 7.22697     | 2.357          | 3.066   | 0.003                |
| $b'_{13}$   | -0.0574181  | 0.1034         | -0.555  | 0.581                |
| $b'_{23}$   | -0.0130537  | 0.04149        | -0.315  | 0.754                |

<sup>a</sup> Significant if p-value < 0.05

The corresponding analysis of variance is reported in Table 5.

Table 5 – Analysis of variance (ANOVA)

| Source                        | Degree of freedom | Mean square | F-value | p-value <sup>a</sup> |
|-------------------------------|-------------------|-------------|---------|----------------------|
| X <sub>1</sub>                | 1                 | 1469.6      | 43.8623 | 0.0000               |
| X <sub>2</sub>                | 1                 | 230.4       | 6.8767  | 0.0108               |
| X <sub>3</sub>                | 1                 | 116.18      | 3.4674  | 0.0670               |
| X <sub>1</sub> <sup>2</sup>   | 1                 | 1254.7      | 37.4469 | 0.0000               |
| X <sub>2</sub> <sup>2</sup>   | 1                 | 559.23      | 16.6911 | 0.0001               |
| X <sub>3</sub> <sup>2</sup>   | 1                 | 80.844      | 2.4129  | 0.1251               |
| X <sub>1</sub> X <sub>2</sub> | 1                 | 314.87      | 9.3979  | 0.0031               |
| X <sub>1</sub> X <sub>3</sub> | 1                 | 10.33       | 0.3083  | 0.5806               |
| X <sub>2</sub> X <sub>3</sub> | 1                 | 3.3157      | 0.0990  | 0.7541               |
| Residual                      | 66                | 33.505      |         |                      |

<sup>a</sup> Significant if p-value < 0.05

## Implemented Bayesian optimization

### General information for the Bayesian optimization

The implementation of the optimization workflow relied on several essential Python libraries. **Pandas** and **NumPy** were used for efficient data manipulation and numerical operations, respectively, forming the backbone of the data preprocessing and feature engineering steps. The **scikit-learn** library provided the core functionality for Gaussian Process Regression (GaussianProcessRegressor) along with kernel definitions such as RBF (Radial Basis Function) and ConstantKernel, as well as normalization tools like MinMaxScaler to ensure the features were properly scaled before model training. To support statistical computations, particularly in the acquisition function (e.g., Expected Improvement), the **SciPy** library offered access to probability distributions (scipy.stats.norm) and distance metrics (scipy.spatial.distance.cdist).

For cheminformatics tasks, the **RDKit** library was employed to compute molecular fingerprints using GetMorganGenerator, enabling similarity calculations and metadata-based modeling through tools such as Chem and DataStructs.

In terms of visualization, **Matplotlib** and **Seaborn** were used, **Matplotlib** served for general plotting, while **Seaborn** provided statistical visualizations such as heatmaps and correlation matrices, facilitating the interpretation of model behavior and experimental trends.

Note that **RDKit** had to be used on **Jupyterlab**.

### Data preparation

The data frame of the currently evaluated reaction `df_hplc` is given the alpha value `alpha_hplc = 5e-2` to consider the elevated noise inherent to the reaction.

The data frame of the previously evaluated reaction `df_Leu` is given the alpha value `alpha_Leu = 8e1` calculation of this value is explained in Improved stabilization of the surrogate.

The data frames are concatenated and scaled

```
df_all = pd.concat([df_Leu, df_hplc], ignore_index=True)
features = ["Eq NaHCO3", "Eq ClACl", "ML", "time (min)"]
scaler = MinMaxScaler()
X_scaled = scaler.fit_transform(df_all[features])
```

The combined objective is defined as a weighted sum of either HPLC conversion or NMR adjusted yield and the corresponding 1/PMI value, both variables having therefore the same range [0;1] and optimization direction (the variables are named after “yield” and “NMR yield” as an artifact of the **1a** reaction).

```
w_yield = 0.5
w_PMI = 0.5
Y_combined = (w_yield * df_all["NMR yield"].to_numpy() +
              w_PMI * df_all["1/PMI"].to_numpy()).reshape(-1, 1)
```

## Surrogate model generation

For information on Kernel choices and GaussianProcessRegressor parameters read `sklearn.gaussian_process` documentation, a simple radial basis function kernel is used with a vector with the same number of dimensions as the inputs X as length scale parameter (anisotropic variant of the kernel).

```
kernel = ConstantKernel(1.0, (1e-2, 1e5)) *
RBF(length_scale=np.ones(4), length_scale_bounds=(1e-2, 1e7))

gp = GaussianProcessRegressor(kernel=kernel, n_restarts_optimizer=50,
alpha=alpha, normalize_y=True)

gp.fit(X_scaled, Y_combined)
```

Length scale of each parameter can give similar information than p values (see above) on the order of magnitude of the influence of each input variable on the function the GP is modeling. To extract use :

```
rbf_kernel = gp.kernel_.k2
if hasattr(rbf_kernel, 'length_scale'):
    print("Optimized length scales:", rbf_kernel.length_scale)
```

## Identify the most informative experimental conditions

The role of the acquisition function is to quickly identify what are the best conditions and guide the optimization to the global maxima. A commonly used acquisition function is Expected Improvement as it is good at balancing exploration and exploitation.

```
Parameters:
    X_candidates_df: pd.DataFrame
        Candidate points at which to evaluate the acquisition
function
```

```

X_candidates_scaled: pd.DataFrame
    Candidate points at which to evaluate the acquisition
scaled
model: GaussianProcessRegressor
    Trained GP model
y_best: float
    Best observed objective value so far
xi: float
    Exploration/exploitation parameter
Returns:
    ei: np.ndarray

```

Classical expected improvement would be defined as below

```

def expected_improvement(X_candidates_df, X_candidates_scaled, model,
y_best, xi=0.01):

    X_candidates = X_candidates_df.values

    mu, sigma = model.predict(X_candidates, return_std=True)
    sigma = sigma.reshape(-1, 1)
    mu = mu.reshape(-1, 1)

    with np.errstate(divide="warn"):
        Z = (mu - y_best - xi) / sigma
        ei = (mu - y_best - xi) * norm.cdf(Z) + sigma * norm.pdf(Z)
        ei[sigma == 0.0] = 0.0

    return ei.flatten()

```

But this function, as it relies on the best observed objective value so far, is very subject to a “lucky” event in a noisy data set.

An alternative is to replace the best observed objective value `y_best` by the best mean value `mu.max()`.

```

def expected_improvement_mu(X_candidates_df, X_candidates_scaled,
model, y_best, xi=0.01):

    X_candidates = X_candidates_df.values

    mu, sigma = model.predict(X_candidates, return_std=True)
    sigma = sigma.reshape(-1, 1)
    mu = mu.reshape(-1, 1)
    mu_best = mu.max()

    with np.errstate(divide="warn"):
        Z = (mu - mu_best - xi) / sigma
        ei = (mu - mu_best - xi) * norm.cdf(Z) + sigma * norm.pdf(Z)

```

```
ei[sigma == 0.0] = 0.0

return ei.flatten()
```

The link between yield and PMI imply that the best value of the PMI can only be obtained if  $\text{NMR\_Yield} = 100\%$ , but there is no reciprocity as the best value of yield can be obtained using excess reactants. PMI is dependent on the  $\text{NMR\_Yield}$  and the mass of reactants, and the theoretical max PMI value of each candidate points can therefore be calculated as:

```
max_PMI_value = (1 * mw_Prod) / (1 * mw_Phe + mw_NaHCO3 *
    X_candidates_df['Eq NaHCO3'] + mw_ClACl * X_candidates_df["Eq ClACl"])
```

with  $\text{mw\_Phe}$ ,  $\text{mw\_ClACl}$ ,  $\text{mw\_NaHCO3}$ ,  $\text{mw\_Prod}$  the molecular weight of the reactants and product of interest.

And the theoretical best  $\text{Y\_combined}$  value of each candidate points can therefore be calculated as:

```
max_y_value = 1 * w_yield + w_ae *
    ((1 * mw_Prod) / (1 * mw_Phe + mw_NaHCO3 *
        X_candidates_df['Eq NaHCO3'] + mw_ClACl *
        X_candidates_df["Eq ClACl"])))
```

The mu expected improvement function is then penalized if the corresponding  $\text{max\_y\_value}$  is lower than the prediction from the `model`. It is, we believe, a convenient way to automatically actualize a constrained EI function that would remove all the candidates that could not improve the pareto in any way.

```
def tempered_expected_improvement(X_candidates_df, X, model, y_best,
    xi=0.01):
    mu, sigma = model.predict(X, return_std=True)
    sigma = sigma.reshape(-1, 1)
    mu = mu.reshape(-1, 1)
    y_best = mu.max()
    beta = 8
    max_y_value = 1 * w_yield + w_ae * \
        ((mw_Prod) / (mw_Phe + mw_NaHCO3 *
            X_candidates_df['Eq NaHCO3'] + mw_ClACl * X_candidates_df["Eq
ClACl"])))
    max_y_value = max_y_value.values.reshape(-1, 1)

    with np.errstate(divide="warn"):
        Z = (mu - y_best - xi) / sigma
```

```

ei = (mu - y_best - xi) * norm.cdf(Z) + sigma * norm.pdf(Z) * \
      (2 / (1 + np.exp(beta - (max_y_value*100/ y_best) * beta)))
ei[sigma == 0.0] = 0.0
ei[ei < 0.0] = 0.0
return ei.flatten()

```

## Minimizing overlap between the explored conditions

This function `select_top_diverse_candidates` selects the top `n` candidate points from a set of candidates (`X_candidates`) by balancing high `tempered_expected_improvement` value and the distance between points

```

def select_top_diverse_candidates(X_candidates, ei_values, n=2):
    sorted_idx = np.argsort(-ei_values)
    selected = [sorted_idx[0]]

    for _ in range(1, n):
        remaining = [i for i in sorted_idx if i not in selected]
        if not remaining:
            break

        dists = cdist(X_candidates[remaining], X_candidates[selected])
        min_dists = dists.min(axis=1)
        next_best_idx = remaining[np.argmax(min_dists)]
        selected.append(next_best_idx)

    return selected

```

## Improved stabilization of the surrogate

Once the acylation of both **1a** and **1b** was achieved we had now two data sets of ‘low fidelity’ data. To use both to stabilize the optimization the acylation of **1c** we needed to order them by their likelihood. The simplest approach other than giving equivalent value to each dataset would be to suggest a structure-reactivity relationship, to that end a multitude of descriptors allow to quantify the similarities between two molecules and machine learning tools have been developed. For this application we have used the Tanimoto index on the Morgan fingerprint of each amino acid, conveniently calculated using

`DataStructs.TanimotoSimilarity`.

```

smiles_dict = {
    "Phenylalanine": "N[C@@H](Cc1ccccc1)C(O)=O",
    "Tyrosine": "N[C@@H](Cc1ccc(O)cc1)C(O)=O",
    "Leucine": "NC(CC(C)C)C(=O)O",
    "Alanine": "C[C@H](N)C(O)=O",
    "Proline": "OC(=O)[C@H]1CCCN1",

```

```

"Lysine": "NCCCC[C@H](N)C(O)=O",
"Lysine(Boc)": "CC(C)(C)OC(=O)NCCCC[C@H](N)C(O)=O",
"Tyrosine(tBu)": "N[C@@H](Cc1ccc(cc1)OC(C)(C)C)C(=O)O",
"Tryptophane": "N[C@@H](Cc1c[nH]c2ccccc12)C(O)=O",
"Glycine": "NCC(O)=O",
"Arginine": "N[C@@H](CCNC(N)=N)C(O)=O",
"Aspartic acid": "N[C@@H](CC(O)=O)C(O)=O",
"Cysteine": "N[C@@H](CS)C(O)=O",
"Glutamic acid": "N[C@@H](CCC(O)=O)C(O)=O",
"Glutamine": "N[C@@H](CCC(N)=O)C(O)=O",
"Asparagine": "N[C@@H](CC(N)=O)C(O)=O",
"Histidine": "N[C@@H](Cc1c[nH]cn1)C(O)=O",
"Isoleucine": "CC[C@H](C)[C@H](N)C(O)=O",
"Methionine": "CSCC[C@H](N)C(O)=O",
"Serine": "N[C@@H](CO)C(O)=O",
"Threonine": "C[C@@H](O)[C@H](N)C(O)=O",
"Valine": "CC(C)[C@H](N)C(O)=O",
}

mols = {name: Chem.MolFromSmiles(smi) for name, smi in
smiles_dict.items()}
generator = GetMorganGenerator(radius=2, fpSize=2048)
fps = {name: generator.GetFingerprint(mol) for name, mol in
mols.items()}

names = list(fps.keys())
sim_mat = pd.DataFrame(index=names, columns=names)

for i in names:
    for j in names:
        sim_mat.loc[i, j] = DataStructs.TanimotoSimilarity(fps[i],
fps[j])

sim_mat = sim_mat.astype(float)

plt.figure(figsize=(15, 10))
sns.heatmap(sim_mat, annot=True, cmap="magma", linewidths=0.5)
plt.title("Tanimoto Similarity")
plt.tight_layout()
plt.show()

```

output :

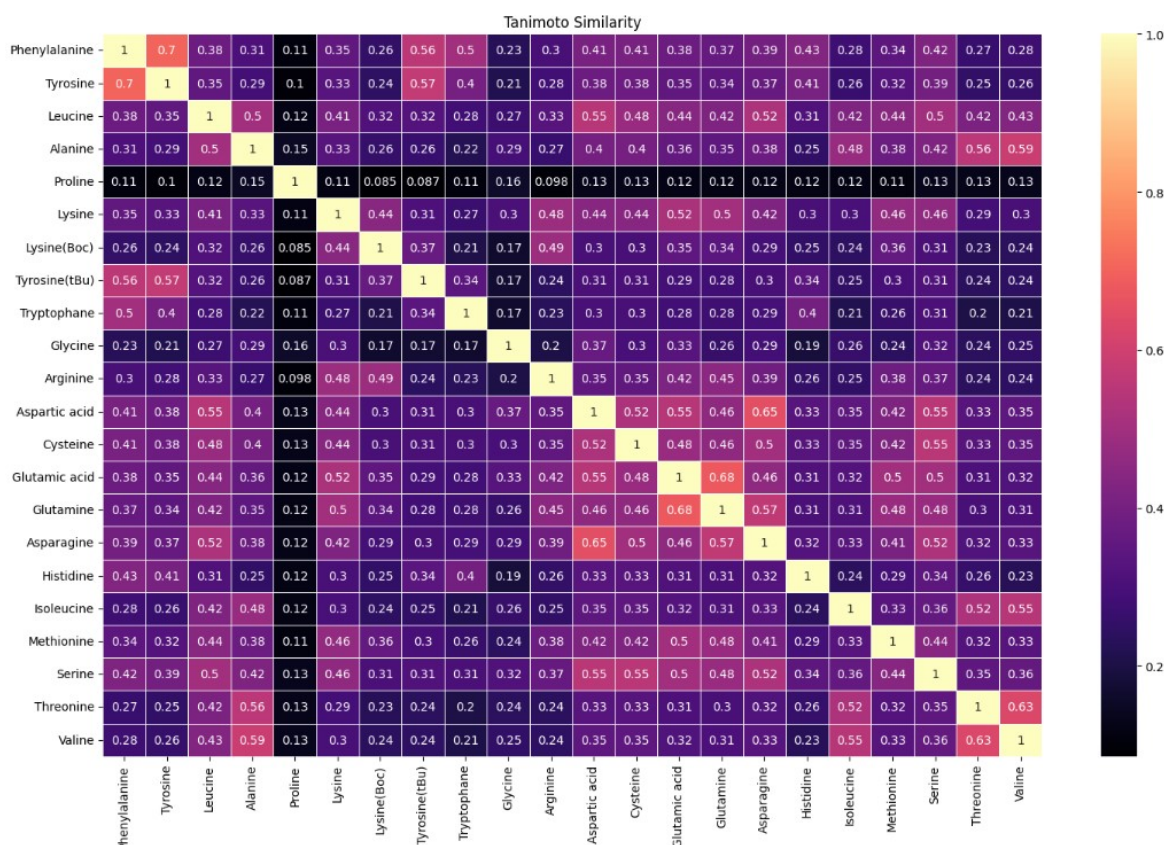

For the acylation of **1c-g**, the data frame of the currently evaluated reaction `df_hp1c` is given the alpha value `alpha_hp1c = 5e-2` to consider the elevated noise inherent to the reaction.

The data frame of the previously evaluated reaction `df_Aaa` is given the alpha value `alpha_Aaacurrent_Aaa = 3e1/ Tanimoto_Aaacurrent_Aaa`.

Where `Tanimoto_Aaacurrent_Aaa` correspond to the Tanimoto value between the currently evaluated amino acid and the one from the previous dataframe.



# Experimental assays for Bayesian optimization

## Acylation of *L*-Leucine **1a**

### Simple BO

The BO algorithm was initiated with the five experiments presented in Table 6 which were designed using a simple centered factorial DoE model.

Table 6 - Experiments used for the initialization of the BO algorithm

| Entry | Chloroacetyl chloride (equiv.) | NaHCO <sub>3</sub> (equiv.) | Reaction time (min) | NMR adjusted yield (%) |
|-------|--------------------------------|-----------------------------|---------------------|------------------------|
| 1     | 1                              | 1                           | 60                  | 65                     |
| 2     | 2                              | 1                           | 5                   | 62                     |
| 3     | 1                              | 2                           | 5                   | 62                     |
| 4     | 1.5                            | 1.5                         | 30                  | 76                     |
| 5     | 2                              | 2                           | 60                  | 84                     |

The BO algorithm suggested the 5 following experiments. Only the two showing the highest expected improvement (EI) were run. In our case, it corresponds to Candidate#1 and candidate #2 (in green).

### Iteration 1 (Entries 6 and 7)

Optimized kernel: 0.976\*\*2 \* RBF(length\_scale=[0.505, 3.96e+06, 0.353])

Optimized length scales: [5.05137619e-01 3.96412011e+06 3.52558553e-01]

--- Coordinates of Best Predicted Point ---

→ w\_yield = 1

→ w\_ae = 0

→ Eq NaHCO<sub>3</sub> = 1.99

→ Eq ClACl = 1.87

→ Time = 57 min

Predicted Combined Objective (mu) = 83.4494

real Combined Objective (mu) = 84.0000

--- Top 5 Diverse High-EI Candidates --

#### Candidate #1

→ Eq NaHCO<sub>3</sub> = 2.10

→ Eq ClACl = 2.97

→ Time = 51 min

μ value = 82.2289

max μ value = 1.0000

Expected Improvement = 1.1527

#### Candidate #2

→ Eq NaHCO<sub>3</sub> = 5.93

→ Eq ClACl = 1.01

→ Time = 10 min  
μ value = 69.8000  
max μ value = 1.0000  
Expected Improvement = 0.2017

Candidate #3

→ Eq NaHCO<sub>3</sub> = 1.02  
→ Eq ClACl = 2.97  
→ Time = 30 min  
μ value = 67.4958  
max μ value = 1.0000  
Expected Improvement = 0.0123

Candidate #4

→ Eq NaHCO<sub>3</sub> = 5.99  
→ Eq ClACl = 1.01  
→ Time = 40 min  
μ value = 69.8000  
max μ value = 1.0000  
Expected Improvement = 0.2017

Candidate #5

→ Eq NaHCO<sub>3</sub> = 6.00  
→ Eq ClACl = 1.11  
→ Time = 21 min  
μ value = 69.8000  
max μ value = 1.0000  
Expected Improvement = 0.2017

**Iteration 2 (Entries 8 and 9)**

Optimized kernel:  $0.922^{**2} * \text{RBF}(\text{length\_scale}=[0.136, 1.04\text{e}+05, 0.336])$   
Optimized length scales: [1.36043932e-01 1.04196350e+05 3.35932315e-01]

--- Coordinates of Best Predicted Point ---

→ w\_yield = 1  
→ w\_ae = 0  
→ Eq NaHCO<sub>3</sub> = 2.18  
→ Eq ClACl = 1.29  
→ Time = 49 min  
Predicted Combined Objective (mu) = 87.3445  
real Combined Objective (mu) = 88.0000

--- Top 5 Diverse High-EI Candidates ---

Candidate #1

→ Eq NaHCO<sub>3</sub> = 2.43  
→ Eq ClACl = 2.95  
→ Time = 50 min  
μ value = 86.1016  
max μ value = 1.0000

Expected Improvement = 1.2030

Candidate #2

→ Eq NaHCO<sub>3</sub> = 5.99

→ Eq ClACl = 1.10

→ Time = 10 min

μ value = 71.1044

max μ value = 1.0000

Expected Improvement = 0.0000

Candidate #3

→ Eq NaHCO<sub>3</sub> = 1.04

→ Eq ClACl = 1.29

→ Time = 30 min

μ value = 71.1803

max μ value = 1.0000

Expected Improvement = 0.0014

Candidate #4

→ Eq NaHCO<sub>3</sub> = 5.91

→ Eq ClACl = 1.14

→ Time = 40 min

μ value = 72.1654

max μ value = 1.0000

Expected Improvement = 0.1386

Candidate #5

→ Eq NaHCO<sub>3</sub> = 1.06

→ Eq ClACl = 2.96

→ Time = 19 min

μ value = 67.2866

max μ value = 1.0000

Expected Improvement = 0.0000

### Iteration 3 (Entry 10)

Optimized kernel: 0.957\*\*2 \* RBF(length\_scale=[0.207, 2.73e+05, 0.402])

Optimized length scales: [2.07200884e-01 2.72974326e+05 4.02326860e-01]

--- Coordinates of Best Predicted Point ---

→ w\_yield = 1

→ w\_ae = 0

→ Eq NaHCO<sub>3</sub> = 2.67

→ Eq ClACl = 2.04

→ Time = 50 min

Predicted Combined Objective (mu) = 92.4879

real Combined Objective (mu) = 93.0000

--- Top 5 Diverse High-EI Candidates ---

Candidate #1

→ Eq NaHCO3 = 2.93  
→ Eq ClACl = 2.38  
→ Time = 52 min  
μ value = 91.6635  
max μ value = 1.0000  
Expected Improvement = 1.54824063

Candidate #2

→ Eq NaHCO3 = 5.96  
→ Eq ClACl = 1.09  
→ Time = 10 min  
μ value = 71.0319  
max μ value = 1.0000  
Expected Improvement = 0.00000000

Candidate #3

→ Eq NaHCO3 = 1.02  
→ Eq ClACl = 2.46  
→ Time = 31 min  
μ value = 71.3372  
max μ value = 1.0000  
Expected Improvement = 0.00000031

Candidate #4

→ Eq NaHCO3 = 6.00  
→ Eq ClACl = 1.05  
→ Time = 41 min  
μ value = 67.3914  
max μ value = 1.0000  
Expected Improvement = 0.00000000

Candidate #5

→ Eq NaHCO3 = 5.96  
→ Eq ClACl = 2.90  
→ Time = 21 min  
μ value = 69.1805  
max μ value = 1.0000  
Expected Improvement = 0.00000000

**Iteration 4 (Entry 12)**

Optimized kernel:  $0.895^{*2} * \text{RBF}(\text{length\_scale}=[0.179, 7.63\text{e}+06, 0.378])$   
Optimized length scales:  $[1.78543818\text{e}-01 \ 7.62782322\text{e}+06 \ 3.78202495\text{e}-01]$

--- Coordinates of Best Predicted Point ---

→ w\_yield = 1  
→ w\_ae = 0  
→ Eq NaHCO3 = 2.43  
→ Eq ClACl = 3.91  
→ Time = 49 min  
Predicted Combined Objective (mu) = 90.6571

real Combined Objective ( $\mu$ ) = 93.0000

--- Top 5 Diverse High-EI Candidates ---

Candidate #1

→ Eq NaHCO<sub>3</sub> = 2.43

→ Eq ClACl = 1.89

→ Time = 45 min

$\mu$  value = 90.2853

max  $\mu$  value = 1.0000

Expected Improvement = 0.75401096

Candidate #2

→ Eq NaHCO<sub>3</sub> = 5.90

→ Eq ClACl = 3.96

→ Time = 10 min

$\mu$  value = 71.0895

max  $\mu$  value = 1.0000

Expected Improvement = 0.00000000

Candidate #3

→ Eq NaHCO<sub>3</sub> = 1.00

→ Eq ClACl = 1.03

→ Time = 27 min

$\mu$  value = 70.8053

max  $\mu$  value = 1.0000

Expected Improvement = 0.00000000

Candidate #4

→ Eq NaHCO<sub>3</sub> = 5.90

→ Eq ClACl = 3.91

→ Time = 60 min

$\mu$  value = 70.5102

max  $\mu$  value = 1.0000

Expected Improvement = 0.00648610

Candidate #5

→ Eq NaHCO<sub>3</sub> = 5.95

→ Eq ClACl = 3.88

→ Time = 36 min

$\mu$  value = 67.4420

max  $\mu$  value = 1.0000

Expected Improvement = 0.00000000

**Iteration 5 (Entry 14)**

Optimized kernel: 0.923\*\*2 \* RBF(length\_scale=[0.193, 1.96, 0.386])

Optimized length scales: [0.19294497 1.95936135 0.38638683]

--- Coordinates of Best Predicted Point ---

→ w\_yield = 1

→  $w_{ae} = 0$   
→ Eq NaHCO<sub>3</sub> = 2.43  
→ Eq ClACl = 3.99  
→ Time = 51 min  
Predicted Combined Objective ( $\mu$ ) = 90.7935  
real Combined Objective ( $\mu$ ) = 93.0000

--- Top 5 Diverse High-El Candidates ---

Candidate #1

→ Eq NaHCO<sub>3</sub> = 2.47  
→ Eq ClACl = 4.00  
→ Time = 52 min  
 $\mu$  value = 90.7668  
max  $\mu$  value = 1.0000  
Expected Improvement = 0.96136377

Candidate #2

→ Eq NaHCO<sub>3</sub> = 5.96  
→ Eq ClACl = 1.05  
→ Time = 10 min  
 $\mu$  value = 71.0374  
max  $\mu$  value = 1.0000  
Expected Improvement = 0.00000000

Candidate #3

→ Eq NaHCO<sub>3</sub> = 1.02  
→ Eq ClACl = 3.94  
→ Time = 31 min  
 $\mu$  value = 72.7072  
max  $\mu$  value = 1.0000  
Expected Improvement = 0.00000000

Candidate #4

→ Eq NaHCO<sub>3</sub> = 5.92  
→ Eq ClACl = 1.01  
→ Time = 41 min  
 $\mu$  value = 68.0123  
max  $\mu$  value = 1.0000  
Expected Improvement = 0.00000000

Candidate #5

→ Eq NaHCO<sub>3</sub> = 5.98  
→ Eq ClACl = 1.07  
→ Time = 21 min  
 $\mu$  value = 67.9989  
max  $\mu$  value = 1.0000  
Expected Improvement = 0.00000000

**Iteration 6 (Entry 15)**

Optimized kernel:  $0.947^{**2} * \text{RBF}(\text{length\_scale}=[0.194, 1.22\text{e}+06, 0.384])$   
Optimized length scales:  $[1.94288544\text{e}-01 \ 1.21582161\text{e}+06 \ 3.83761479\text{e}-01]$

--- Coordinates of Best Predicted Point ---

→ w\_yield = 1  
→ w\_ae = 0  
→ Eq NaHCO<sub>3</sub> = 2.45  
→ Eq ClACl = 1.46  
→ Time = 51 min  
Predicted Combined Objective (mu) = 89.7417  
real Combined Objective (mu) = 93.0000

--- Top 5 Diverse High-EI Candidates ---

Candidate #1

→ Eq NaHCO<sub>3</sub> = 2.64  
→ Eq ClACl = 3.59  
→ Time = 60 min  
μ value = 88.1711  
max μ value = 1.0000  
Expected Improvement = 0.67936026

Candidate #2

→ Eq NaHCO<sub>3</sub> = 5.83  
→ Eq ClACl = 1.04  
→ Time = 10 min  
μ value = 71.0636  
max μ value = 1.0000  
Expected Improvement = 0.00000000

Candidate #3

→ Eq NaHCO<sub>3</sub> = 1.05  
→ Eq ClACl = 3.99  
→ Time = 35 min  
μ value = 72.7744  
max μ value = 1.0000  
Expected Improvement = 0.00000000

Candidate #4

→ Eq NaHCO<sub>3</sub> = 5.98  
→ Eq ClACl = 1.02  
→ Time = 47 min  
μ value = 71.1912  
max μ value = 1.0000  
Expected Improvement = 0.00000000

Candidate #5

→ Eq NaHCO<sub>3</sub> = 5.99  
→ Eq ClACl = 1.00  
→ Time = 23 min

$\mu$  value = 67.1591  
max  $\mu$  value = 1.0000  
Expected Improvement = 0.00000000

### Iteration 7 (Entry 16)

Optimized kernel:  $0.983^{**2} * \text{RBF}(\text{length\_scale}=[0.194, 7.58\text{e}+06, 0.413])$   
Optimized length scales:  $[1.94437424\text{e}-01 \ 7.58240158\text{e}+06 \ 4.13360878\text{e}-01]$

--- Coordinates of Best Predicted Point ---

→ w\_yield = 1  
→ w\_ae = 0  
→ Eq NaHCO3 = 2.62  
→ Eq ClACl = 3.77  
→ Time = 60 min  
Predicted Combined Objective ( $\mu$ ) = 91.4365  
real Combined Objective ( $\mu$ ) = 93.0000

--- Top 5 Diverse High-EI Candidates ---

#### Candidate #1

→ Eq NaHCO3 = 2.67  
→ Eq ClACl = 3.97  
→ Time = 60 min  
 $\mu$  value = 91.3952  
max  $\mu$  value = 1.0000  
Expected Improvement = 0.78223392

#### Candidate #2

→ Eq NaHCO3 = 5.90  
→ Eq ClACl = 1.34  
→ Time = 10 min  
 $\mu$  value = 71.0282  
max  $\mu$  value = 1.0000  
Expected Improvement = 0.00000000

#### Candidate #3

→ Eq NaHCO3 = 1.06  
→ Eq ClACl = 1.20  
→ Time = 35 min  
 $\mu$  value = 72.7220  
max  $\mu$  value = 1.0000  
Expected Improvement = 0.00000000

#### Candidate #4

→ Eq NaHCO3 = 5.99  
→ Eq ClACl = 1.05  
→ Time = 47 min  
 $\mu$  value = 71.3404  
max  $\mu$  value = 1.0000  
Expected Improvement = 0.00000000



Candidate #5

→ Eq NaHCO<sub>3</sub> = 1.05

→ Eq ClAcI = 3.99

→ Time = 22 min

μ value = 69.1961

max μ value = 1.0000

Expected Improvement = 0.00000000

The experiments ran for this section are combined in Table 7.

Table 7 - Conducted experiments for the acylation of L-Leucine using BO

| Entry | Chloroacetyl chloride (equiv.) | NaHCO <sub>3</sub> (equiv.) | Reaction time (min) | NMR adjusted yield (%) |
|-------|--------------------------------|-----------------------------|---------------------|------------------------|
| 6     | 2.97                           | 2.1                         | 50                  | 88                     |
| 7     | 1.25                           | 5.89                        | 10                  | 71                     |
| 8     | 2.95                           | 2.43                        | 50                  | 93                     |
| 9     | 1.14                           | 5.91                        | 40                  | 67                     |
| 10    | 2.38                           | 2.93                        | 50                  | 86                     |
| 11    | 2.46                           | 1.02                        | 30                  | 72                     |
| 12    | 1.89                           | 2.43                        | 45                  | 88                     |
| 13    | 3.91                           | 5.9                         | 60                  | 79                     |
| 14    | 4                              | 2.47                        | 50                  | 89                     |
| 15    | 3.59                           | 2.64                        | 60                  | 93                     |
| 16    | 3.97                           | 2.67                        | 60                  | 88                     |

## Combination of OFAT/DoE and BO

The Bayesian algorithm was initiated by the results from OFAT and DoE.

Table 8 - Experimental data used to initiate the Bayesian algorithm

| Entry | Chloroacetyl chloride (equiv.) | NaHCO <sub>3</sub> (equiv.) | Reaction time (min) | Milling load (mg/mL) | NMR adjusted yield (%) |
|-------|--------------------------------|-----------------------------|---------------------|----------------------|------------------------|
| 1     | 1.58                           | 1.5                         | 60                  | 43.56                | 57                     |
| 2     | 1.2                            | 1.5                         | 60                  | 39.27                | 64                     |
| 3     | 1.3                            | 1.5                         | 60                  | 40.40                | 74                     |
| 4     | 1.3                            | 1.5                         | 30                  | 40.40                | 68                     |
| 5     | 1.5                            | 1.5                         | 30                  | 42.66                | 76                     |
| 6     | 1.3                            | 1.5                         | 5                   | 40.40                | 63                     |
| 7     | 1.3                            | 1.5                         | 10                  | 40.40                | 62                     |
| 8     | 1.3                            | 1.5                         | 15                  | 40.40                | 72                     |
| 9     | 1                              | 1                           | 5                   | 32.81                | 50                     |
| 10    | 1.3                            | 1.3                         | 5                   | 38.72                | 70                     |

|    |     |     |    |       |    |
|----|-----|-----|----|-------|----|
| 11 | 1   | 1.3 | 5  | 35.33 | 55 |
| 12 | 1   | 1.5 | 5  | 37.01 | 56 |
| 13 | 1.3 | 1.4 | 5  | 39.56 | 62 |
| 14 | 1.3 | 1.2 | 5  | 37.88 | 71 |
| 15 | 1.3 | 1   | 5  | 36.20 | 60 |
| 16 | 1.3 | 1   | 15 | 36.20 | 60 |
| 17 | 0.9 | 1.3 | 5  | 34.20 | 49 |
| 18 | 1.3 | 1.5 | 5  | 40.40 | 68 |
| 19 | 1.5 | 1.5 | 60 | 42.66 | 82 |
| 20 | 1.5 | 1.5 | 60 | 42.66 | 76 |
| 21 | 1.3 | 1.5 | 5  | 40.40 | 70 |
| 22 | 1.3 | 1.5 | 5  | 40.40 | 69 |
| 23 | 1   | 1   | 5  | 32.81 | 50 |
| 24 | 1   | 1   | 5  | 32.81 | 56 |
| 25 | 1.3 | 1.3 | 15 | 38.72 | 71 |
| 26 | 1.3 | 1.3 | 15 | 38.72 | 72 |
| 27 | 1.3 | 1.3 | 15 | 38.72 | 46 |
| 28 | 1.3 | 1.3 | 15 | 38.72 | 52 |
| 29 | 1.5 | 1.5 | 5  | 42.66 | 82 |
| 30 | 1.5 | 1.5 | 5  | 42.66 | 85 |
| 31 | 1.5 | 1.2 | 15 | 40.14 | 62 |
| 32 | 1.5 | 1.2 | 15 | 40.14 | 80 |
| 33 | 1.3 | 1.3 | 15 | 38.72 | 69 |
| 34 | 1.3 | 1.3 | 15 | 38.72 | 68 |
| 35 | 1.5 | 1.5 | 5  | 42.66 | 76 |
| 36 | 1.5 | 1.5 | 5  | 42.66 | 76 |
| 37 | 1.5 | 1.2 | 15 | 40.14 | 63 |
| 38 | 1.5 | 1.2 | 15 | 40.14 | 82 |
| 39 | 1.6 | 1.5 | 60 | 43.79 | 85 |
| 40 | 1.6 | 1.5 | 60 | 43.79 | 78 |
| 41 | 1.5 | 1.4 | 15 | 41.82 | 81 |
| 42 | 1.5 | 1.4 | 15 | 41.82 | 93 |
| 43 | 1.5 | 1.3 | 15 | 40.98 | 73 |
| 44 | 1.5 | 1.3 | 15 | 40.98 | 69 |
| 45 | 1.5 | 1.2 | 15 | 40.14 | 71 |
| 46 | 1.5 | 1.2 | 15 | 40.14 | 76 |
| 47 | 2   | 1.5 | 60 | 48.31 | 75 |
| 48 | 2   | 1.5 | 60 | 48.31 | 76 |
| 49 | 1.5 | 1   | 5  | 38.46 | 53 |
| 50 | 1   | 1   | 60 | 32.81 | 65 |
| 51 | 1.5 | 1   | 60 | 38.46 | 68 |
| 52 | 1   | 1.5 | 60 | 37.01 | 55 |

|    |     |     |    |        |     |
|----|-----|-----|----|--------|-----|
| 53 | 1.3 | 1.3 | 60 | 38.72  | 78  |
| 54 | 1   | 1.3 | 30 | 35.33  | 59  |
| 55 | 1.5 | 1.3 | 30 | 40.98  | 79  |
| 56 | 1.3 | 1   | 30 | 36.20  | 66  |
| 57 | 1.3 | 1.3 | 30 | 38.72  | 70  |
| 58 | 2   | 1   | 5  | 44.11  | 62  |
| 59 | 1   | 2   | 5  | 41.21  | 62  |
| 60 | 2   | 2   | 5  | 52.51  | 75  |
| 61 | 2   | 1   | 60 | 44.11  | 66  |
| 62 | 1   | 2   | 60 | 41.21  | 64  |
| 63 | 2   | 2   | 60 | 52.51  | 96  |
| 64 | 1   | 1.5 | 30 | 37.01  | 58  |
| 65 | 2   | 1.5 | 30 | 48.307 | 75  |
| 66 | 1.5 | 1   | 30 | 38.46  | 68  |
| 67 | 1.5 | 2   | 30 | 46.86  | 91  |
| 68 | 2   | 2   | 60 | 52.51  | 98  |
| 69 | 2   | 2   | 60 | 52.51  | 95  |
| 70 | 1.5 | 2   | 30 | 46.86  | 90  |
| 71 | 1.5 | 2   | 30 | 46.86  | 90  |
| 72 | 2   | 2   | 60 | 52.51  | 83  |
| 73 | 2   | 2   | 60 | 52.51  | 85  |
| 74 | 1.5 | 2   | 30 | 46.86  | 94  |
| 75 | 1.5 | 2   | 30 | 46.86  | 88  |
| 76 | 1.7 | 2   | 15 | 49.12  | 81  |
| 77 | 1.7 | 2   | 15 | 49.12  | 95  |
| 78 | 1.8 | 2   | 30 | 50.25  | 93  |
| 79 | 1.8 | 2   | 30 | 50.25  | 85  |
| 80 | 1   | 4   | 5  | 58.02  | 55  |
| 81 | 1   | 4   | 5  | 58.02  | 51  |
| 82 | 1   | 4   | 60 | 58.02  | 60  |
| 83 | 1   | 4   | 60 | 58.02  | 61  |
| 84 | 2   | 4   | 5  | 69.31  | 65  |
| 85 | 2   | 4   | 5  | 69.31  | 90  |
| 86 | 2   | 4   | 60 | 69.31  | 82  |
| 87 | 2   | 4   | 60 | 69.31  | 83  |
| 88 | 1.5 | 4   | 30 | 63.66  | 86  |
| 89 | 1.5 | 4   | 30 | 63.66  | 100 |
| 90 | 1   | 2   | 30 | 41.21  | 56  |
| 91 | 1   | 2   | 30 | 41.21  | 56  |
| 92 | 2   | 2   | 30 | 52.51  | 89  |
| 93 | 2   | 2   | 30 | 52.51  | 85  |
| 94 | 1.5 | 2   | 60 | 46.86  | 81  |

|     |     |     |    |       |     |
|-----|-----|-----|----|-------|-----|
| 95  | 1.5 | 2   | 60 | 46.86 | 84  |
| 96  | 1.5 | 2   | 5  | 46.86 | 93  |
| 97  | 1.5 | 2   | 5  | 46.86 | 87  |
| 98  | 1.9 | 3.4 | 30 | 63.14 | 107 |
| 99  | 1.9 | 3.4 | 30 | 63.14 | 92  |
| 100 | 1.9 | 3.4 | 30 | 63.14 | 90  |
| 101 | 1.9 | 3.4 | 30 | 63.14 | 95  |
| 102 | 1.5 | 2.5 | 5  | 51.06 | 71  |
| 103 | 1.5 | 2.5 | 5  | 51.06 | 74  |
| 104 | 1.5 | 2.5 | 60 | 51.06 | 81  |
| 105 | 1.5 | 2.5 | 60 | 51.06 | 83  |
| 106 | 1   | 2.5 | 30 | 45.41 | 61  |
| 107 | 1   | 2.5 | 30 | 45.41 | 60  |
| 108 | 2   | 2.5 | 30 | 56.71 | 90  |
| 109 | 2   | 2.5 | 30 | 56.71 | 107 |
| 110 | 1.5 | 1.5 | 15 | 42.66 | 76  |
| 111 | 1.5 | 1.5 | 10 | 42.66 | 68  |
| 112 | 1.5 | 1   | 15 | 38.46 | 79  |

A series of 10 additional experiments was then conducted whose conditions are summarized in Table 9.

Table 9 - Series of 10 experiments suggested by the Bayesian algorithm for the acylation of *L*-Leucine **1a**

| Iteration | Equiv. NaHCO <sub>3</sub> | Equiv. Chloroacetyl Chloride | Milling Time (min) | Milling Load (mg/mL) | NMR adjusted yield (%) | PMI |
|-----------|---------------------------|------------------------------|--------------------|----------------------|------------------------|-----|
| 1         | 3.02                      | 1.71                         | 30                 | 57.20                | 83                     | 3.4 |
| 2         | 2.43                      | 1.65                         | 30                 | 58.43                | 82                     | 3.1 |
| 3         | 3.12                      | 1.71                         | 30                 | 45.00                | 86                     | 3.3 |
| 4         | 2.53                      | 1.78                         | 30                 | 45.04                | 86                     | 3.1 |
| 5         | 3.20                      | 1.85                         | 30                 | 46.01                | 87                     | 3.4 |
| 6         | 3.80                      | 1.88                         | 30                 | 47.61                | 90                     | 3.5 |
| 7         | 3.24                      | 1.85                         | 30                 | 47.43                | 86                     | 3.4 |
| 8         | 1.76                      | 1.70                         | 30                 | 44.77                | 88                     | 2.6 |
| 9         | 2.80                      | 2.00                         | 60                 | 45.2                 | 79                     | 3.6 |
| 10        | 2.23                      | 2.00                         | 30                 | 49.17                | 89                     | 2.9 |

## Acylation of *L*-Phenylalanine **1b**

Additionally to the results on *L*-Leucine **1a**, experimental results involving **1b** were used to initiated the algorithm. The corresponding experiments are reported in Table 10.

Table 10 - Initialization phase of BO with **1b**

| Entry | Equiv. | Equiv. | Milling | Milling | HPLC | PMI |
|-------|--------|--------|---------|---------|------|-----|
|-------|--------|--------|---------|---------|------|-----|

|    | NaHCO <sub>3</sub> <sup>a</sup> | Chloroacetyl Chloride <sup>a</sup> | Time (min) | Load (mg/mL) | conversion (%) |     |
|----|---------------------------------|------------------------------------|------------|--------------|----------------|-----|
| 1  | 1.5                             | 1.4                                | 15         | 45.22        | 81             | 2.3 |
| 2  | 1.5                             | 1.4                                | 15         | 45.22        | 94             | 2.0 |
| 3  | 1.5                             | 1.4                                | 15         | 45.22        | 83             | 2.3 |
| 4  | 1.5                             | 1.4                                | 15         | 45.22        | 89             | 2.1 |
| 5  | 1.5                             | 1.4                                | 15         | 45.22        | 80             | 2.3 |
| 6  | 1.5                             | 1.4                                | 15         | 45.22        | 77             | 2.4 |
| 7  | 1                               | 1                                  | 15         | 36.21        | 67             | 2.2 |
| 8  | 1                               | 1                                  | 15         | 36.21        | 62             | 2.4 |
| 9  | 1.7                             | 2                                  | 15         | 52.52        | 87             | 2.5 |
| 10 | 1.7                             | 2                                  | 15         | 52.52        | 85             | 2.6 |
| 11 | 1.9                             | 3.4                                | 30         | 66.54        | 92             | 3.0 |
| 12 | 1.9                             | 3.4                                | 30         | 66.54        | 90             | 3.1 |

<sup>a</sup> Calculated for 1 equiv. of **1b**

Following the initiation, the experiments reported in Table 11 were part of the iteration study to stabilize the model.

Table 11 - Iteration phase of BO with **1b**

| Iteration | Equiv. NaHCO <sub>3</sub> <sup>a</sup> | Equiv. Chloroacetyl Chloride <sup>a</sup> | Milling Time (min) | Milling Load (mg/mL) | HPLC conversion (%) | PMI |
|-----------|----------------------------------------|-------------------------------------------|--------------------|----------------------|---------------------|-----|
| 1         | 1.99                                   | 2.56                                      | 60                 | 55.50                | 73                  | 3.5 |
| 2         | 1.99                                   | 2.45                                      | 60                 | 43.10                | 77                  | 3.3 |
| 3         | 1.95                                   | 1.58                                      | 15                 | 20.80                | 66                  | 3.2 |
| 4         | 2.01                                   | 1.61                                      | 15                 | 35.90                | 66                  | 3.2 |
| 5         | 1.58                                   | 1.46                                      | 30                 | 57.26                | 79                  | 2.4 |
| 6         | 1.58                                   | 1.46                                      | 35                 | 34.94                | 82                  | 2.3 |
| 7         | 1.19                                   | 1.46                                      | 15                 | 20.44                | 76                  | 2.3 |
| 8         | 5.78                                   | 2.41                                      | 60                 | 50.00                | 62                  | 6.2 |
| 9         | 1.15                                   | 2.41                                      | 45                 | 20.03                | 73                  | 3.0 |
| 10        | 5.41                                   | 1.30                                      | 30                 | 49.99                | 74                  | 4.3 |
| 11        | 5.78                                   | 2.41                                      | 60                 | 20.00                | 89                  | 4.3 |
| 12        | 1.26                                   | 1.30                                      | 45                 | 19.96                | 77                  | 2.2 |
| 13        | 5.06                                   | 2.04                                      | 50                 | 20.12                | 92                  | 3.7 |
| 14        | 3.93                                   | 1.59                                      | 10                 | 49.94                | 87                  | 3.2 |
| 15        | 1.04                                   | 1.55                                      | 20                 | 20.04                | 70                  | 2.5 |
| 16        | 1.35                                   | 1.32                                      | 40                 | 36.20                | 75                  | 2.4 |
| 17        | 3.12                                   | 1.86                                      | 50                 | 49.92                | 80                  | 3.3 |

<sup>a</sup> Calculated for 1 equiv. of **1b**

Finally, the model was tasked with identifying conditions that either maximize HPLC conversion, minimize the PMI value or strike a balance between the two objectives.

Table 12 - Values of the Pareto front for the acylation of **1b**

| Entry | Equiv. | Equiv. | Milling | Milling | HPLC | PMI |
|-------|--------|--------|---------|---------|------|-----|
|-------|--------|--------|---------|---------|------|-----|

|    | NaHCO <sub>3</sub> <sup>a</sup> | Chloroacetyl Chloride <sup>a</sup> | Time (min) | Load (mg/mL) | conversion (%) |     |
|----|---------------------------------|------------------------------------|------------|--------------|----------------|-----|
| 1  | 1.5                             | 1.26                               | 30         | 39.9         | 76             | 2.4 |
| 2  | 1.5                             | 1.26                               | 30         | 39.9         | 78             | 2.3 |
| 3  | 1.49                            | 1.39                               | 30         | 43           | 84             | 2.2 |
| 4  | 1.49                            | 1.39                               | 30         | 43           | 83             | 2.2 |
| 5  | 2.04                            | 5.05                               | 30         | 20.31        | 96             | 3.5 |
| 6  | 2.04                            | 5.05                               | 30         | 20.31        | 97             | 3.5 |
| 7  | 2.04                            | 5.26                               | 30         | 20.53        | 100            | 3.5 |
| 8  | 2.04                            | 5.26                               | 30         | 20.53        | 100            | 3.5 |
| 9  | 1.03                            | 1.31                               | 30         | 22.74        | 68             | 2.4 |
| 10 | 1.03                            | 1.31                               | 30         | 22.74        | 69             | 2.3 |

<sup>a</sup> Calculated for 1 equiv. of **1b**

## Experimental procedures and product characterizations

In this section, only the experimental conditions providing the best conversions/NMR adjusted yield are described.

### N-(2-chloroacetyl)-L-Leucine [688-12-0]

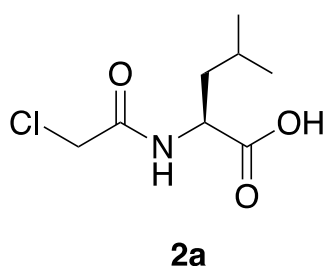

A 10 mL stainless steel (SS) jar was loaded with a 10 mm SS ball, H-L-Leu-OH (131.2 mg, 1 mmol, 1 equiv.), NaHCO<sub>3</sub> (285.6 mg, 3.40 mmol, 3.4 equiv.) and chloroacetyl chloride (151 μL, 1.90 mmol, 1.9 equiv.). The mixture was subjected to grinding at 30 Hz for 30 min. Then, the mixture was recovered from ethyl acetate and water. The water phase was acidified with a 1M HCl aqueous solution and extracted twice with ethyl acetate. The combined organic phases were washed with brine, dried over Na<sub>2</sub>SO<sub>4</sub> and concentrated under reduced pressure. The crude product was finally washed with a 1M HCl aqueous solution to yield compound **2a** as a white solid (159.9 mg, 77% yield).

<sup>1</sup>H NMR (500 MHz, CDCl<sub>3</sub>) δ 6.93 (d, J = 8.3 Hz, 1H), 4.68 – 4.61 (m, 1H), 4.11 (s, 2H), 1.82 – 1.62 (m, 3H), 0.98 (d, J = 6.3 Hz, 3H), 0.97 (d, J = 6.3 Hz, 3H)

<sup>13</sup>C NMR (126 MHz, CDCl<sub>3</sub>) δ 176.8, 166.5, 51.1, 42.5, 41.1, 25.0, 22.9, 21.9

HRMS (ESI): [M+H]<sup>+</sup> Calculated for C<sub>8</sub>H<sub>15</sub>ClNO<sub>3</sub>: 208.0735, found 208.0736

m.p.: 129.0 - 129.7°C

Data in agreement with literature.<sup>1</sup>

### N-(2-chloroacetyl)-L-phenylalanine [721-65-3]

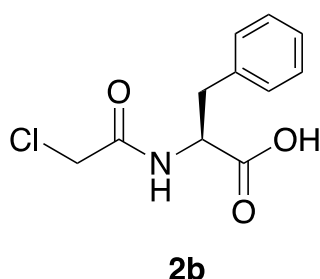

A 10 mL stainless steel (SS) jar was loaded with a 10 mm SS ball, H-L-Phe-OH (38.4 mg, 0.23 mmol, 1 equiv.), NaHCO<sub>3</sub> (102.7 mg,

1.22 mmol, 5.26 equiv.) and chloroacetyl chloride (38  $\mu$ L, 0.47 mmol, 2.04 equiv.). The mixture was subjected to grinding at 30 Hz for 30 min. Then, the mixture was recovered from ethyl acetate and water. The water phase was acidified with a 1M HCl aqueous solution and extracted twice with ethyl acetate. The combined organic phases were washed with brine, dried over Na<sub>2</sub>SO<sub>4</sub> and concentrated under reduced pressure. The crude product was finally washed with a 1M HCl aqueous solution to yield compound **2b** as a white solid (44 mg, 79% yield).

**<sup>1</sup>H NMR (500 MHz, CDCl<sub>3</sub>)**  $\delta$  7.37 – 7.27 (m, 3H), 7.21 – 7.15 (m, 2H), 6.97 (d, *J* = 7.7 Hz, 1H), 4.94 – 4.87 (m, 1H), 4.06 (d, *J* = 18.7 Hz, 1H), 4.03 (d, *J* = 18.7 Hz, 1H), 3.25 (dd, *J* = 14.0, 5.5 Hz, 1H), 3.17 (dd, *J* = 14.0, 6.2 Hz, 1H)

**<sup>13</sup>C NMR (126 MHz, CDCl<sub>3</sub>)**  $\delta$  174.7, 166.3, 135.13, 53.3, 42.5, 37.4

**HRMS (ESI):** [M+H]<sup>+</sup> Calculated for C<sub>11</sub>H<sub>13</sub>ClNO<sub>3</sub>: 242.0584, found 242.0579

**m.p.:** 130.2 – 131.3°C

Data in agreement with literature.<sup>1</sup>

### *O*-benzyl-*N*-(2-chloroacetyl)-*L*-serine [3062-02-0]

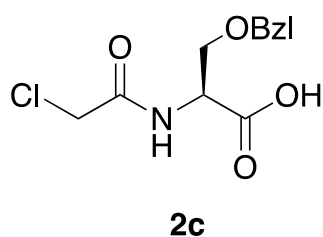

A 10 mL stainless steel (SS) jar was loaded with a 10 mm SS ball, H-*L*-Ser(Bzl)-OH (93.6 mg, 0.48 mmol, 1 equiv.), NaHCO<sub>3</sub> (228.3 mg, 2.72 mmol, 5.7 equiv.) and chloroacetyl chloride (107  $\mu$ L, 1.30 mmol, 2.79 equiv.). The mixture was subjected to grinding at 30 Hz for 10 min. Then, the mixture was recovered from ethyl acetate and water. The water phase was acidified with a 1M HCl aqueous

solution and extracted twice with ethyl acetate. The combined organic phases were washed with brine, dried over Na<sub>2</sub>SO<sub>4</sub> and concentrated under reduced pressure. The oily crude product was finally triturated in Et<sub>2</sub>O at 0°C, filtered and dried under vacuum to yield compound **2c** as a white solid (115 mg, 88% yield).

**<sup>1</sup>H NMR (500 MHz, CDCl<sub>3</sub>)**  $\delta$  7.43 - 7.27 (m, 6H), 4.80 – 4.72 (m, 1H), 4.57 (d, *J* = 26.2 Hz, 1H), 4.55 (d, *J* = 26.2 Hz, 1H), 4.11 (d, *J* = 25.4 Hz, 1H), 4.08 (d, *J* = 25.4 Hz, 1H), 3.99 (dd, *J* = 9.6, 3.0 Hz, 1H), 3.72 (dd, *J* = 9.6, 3.4 Hz, 1H)

**<sup>13</sup>C NMR (126 MHz, CDCl<sub>3</sub>)**  $\delta$  173.9, 166.6, 137.1, 128.7, 128.2, 127.9, 73.6, 68.83, 52.9, 42.5

**HRMS (ESI):** [M+Na]<sup>+</sup> Calculated for C<sub>12</sub>H<sub>14</sub>ClNO<sub>4</sub>Na: 336.0979, found 336.0974

**m.p.:** 114.8 – 115.4°C

### *N*<sup>6</sup>-((benzyloxy)carbonyl)-*N*<sup>2</sup>-(2-chloroacetyl)-*L*-lysine [47376-73-8]

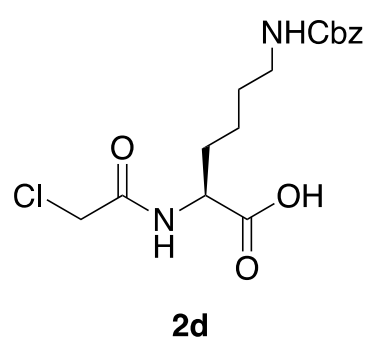

A 10 mL stainless steel (SS) jar was loaded with a 10 mm SS ball, H-*L*-Lys(Cbz)-OH (104.9 mg, 0.40 mmol, 1 equiv.), NaHCO<sub>3</sub> (124.5 mg, 4.0 mmol, 3.96 equiv.) and chloroacetyl chloride (86  $\mu$ L, 1.10 mmol, 2.87 equiv.). The mixture was

subjected to grinding at 30 Hz for 60 min. Then, the mixture was recovered from ethyl acetate and water. The water phase was acidified with a 1M HCl aqueous solution and extracted twice with ethyl acetate. The combined organic phases were washed with brine, dried over Na<sub>2</sub>SO<sub>4</sub> and concentrated under reduced pressure. The oily crude product was finally triturated in Et<sub>2</sub>O at 0°C, filtered and dried under vacuum to yield compound **2d** as a colorless wax (98 mg, 74% yield).

Two rotamers with a ratio 6.7/3.3

**<sup>1</sup>H NMR (500 MHz, CDCl<sub>3</sub>)** δ 7.41 – 7.27 (m, 6H), 5.21 – 4.99 (m, 3H), 4.67 – 4.56 (m, 1H), 4.07 (s, 2H), 3.31 – 3.07 (m, 2H), 2.04 – 1.72 (m, 2H), 1.62 – 1.30 (m, 4H)

**<sup>13</sup>C NMR (126 MHz, CDCl<sub>3</sub>)** δ 174.6, 174.3, 166.9, 166.5, 158.5, 157.0, 136.4, 136.0, 128.7, 128.4, 128.3, 128.2, 128.1, 67.6, 67.0, 52.5, 42.5, 41.1, 40.6, 31.4, 29.5, 29.1, 22.2, 21.9

**HRMS (ESI):** [M+H]<sup>+</sup> Calculated for C<sub>16</sub>H<sub>22</sub>ClN<sub>2</sub>O<sub>5</sub>: 357.1212, found 357.1212

### (S)-3-(4-(tert-butoxy)phenyl)-2-(2-chloroacetamido)propanoic acid

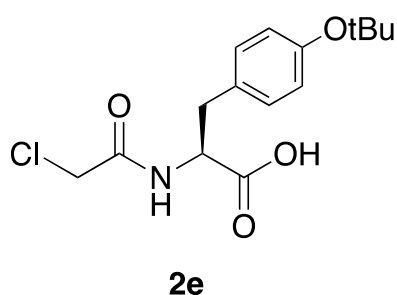

A 10 mL stainless steel (SS) jar was loaded with a 10 mm SS ball, H-*L*-Tyr(tBu)-OH (152.7 mg, 0.64 mmol, 1 equiv.), NaHCO<sub>3</sub> (133.0 mg, 1.58 mmol, 2.46 equiv.) and chloroacetyl chloride (131 μL, 1.65 mmol, 2.56 equiv.). The mixture was subjected to grinding at 30 Hz for 60 min. Then, the mixture was recovered from ethyl acetate and water. The water phase was acidified with a 1M HCl aqueous solution and extracted twice with ethyl acetate. The combined organic

phases were washed with brine, dried over Na<sub>2</sub>SO<sub>4</sub> and concentrated under reduced pressure. The crude product was finally washed with a 1M HCl aqueous solution to yield compound **2e** as a white solid (178 mg, 87% yield).

**<sup>1</sup>H NMR (400 MHz, CDCl<sub>3</sub>)** δ 7.10 – 7.03 (m, 2H), 7.00 – 6.91 (m, 3H), 4.89 – 4.80 (m, 1H), 4.05 (d, J = 21.2 Hz, 1H), 4.01 (d, J = 21.2 Hz, 1H), 3.20 (dd, J = 14.2, 5.5 Hz, 1H), 3.12 (dd, J = 14.2, 6.2 Hz, 1H), 1.33 (s, 1H)

**<sup>13</sup>C NMR (101 MHz, CDCl<sub>3</sub>)** δ 174.4, 166.3, 154.6, 129.8, 124.5, 78.8, 53.3, 42.3, 36.6, 28.8

**HRMS (ESI):** [M+Na]<sup>+</sup> Calculated for C<sub>15</sub>H<sub>20</sub>ClNO<sub>4</sub>Na: 336.0979, found 336.0974

**m.p.:** 119.7 – 121.2°C

### (2-chloroacetyl)-*L*-methionine [57230-01-0]

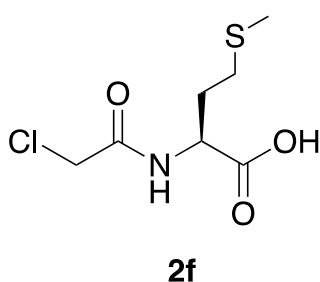

A 10 mL stainless steel (SS) jar was loaded with a 10 mm SS ball, H-*L*-Met-OH (122.0 mg, 0.82 mmol, 1 equiv.), NaHCO<sub>3</sub> (143.2 mg, 1.70 mmol, 2.08 equiv.) and chloroacetyl chloride (148 μL, 1.86 mmol, 2.27 equiv.). The mixture was subjected to grinding at 30 Hz for 15 min. Then, the mixture was recovered from ethyl acetate and water. The water phase was acidified with a 1M HCl



aqueous solution and extracted twice with ethyl acetate. The combined organic phases were washed with brine, dried over Na<sub>2</sub>SO<sub>4</sub> and concentrated under reduced pressure. The oily crude product was finally triturated in Et<sub>2</sub>O at 0°C, filtered and dried under vacuum to yield compound **2f** as a white solid (128.4 mg, 74% yield).

**<sup>1</sup>H NMR (500 MHz, DMSO-*d*<sub>6</sub>)** δ 12.83 (br. s, 1H), 8.55 (d, *J* = 7.8 Hz, 1H), 4.37 – 4.30 (m, 1H), 4.13 (d, *J* = 16.1 Hz, 1H), 4.11 (d, *J* = 16.1 Hz, 1H), 2.54 – 2.42 (m, 2H), 2.04 (s, 3H), 2.03 – 1.95 (m, 1H), 1.92 – 1.84 (m, 1H)

**<sup>13</sup>C NMR (126 MHz, DMSO-*d*<sub>6</sub>)** δ 172.9, 166.2, 51.2, 42.4, 30.5, 39.6, 14.6

**HRMS (ESI):** [M+H]<sup>+</sup> Calculated for C<sub>7</sub>H<sub>13</sub>ClNO<sub>3</sub>S: 226.0299, found 226.0299

**m.p.:** 101 – 102.7°C

### (2-chloroacetyl)-*L*-proline [23500-10-9]

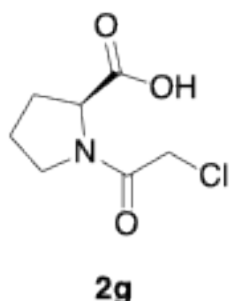

A 10 mL stainless steel (SS) jar was loaded with a 10 mm SS ball, H-*L*-Pro-OH (25.2 mg, 0.20 mmol, 1 equiv.), NaHCO<sub>3</sub> (104.2 mg, 1.24 mmol, 5.67 equiv.) and chloroacetyl chloride (43 μL, 0.54 mmol, 2.48 equiv.). The mixture was subjected to grinding at 30 Hz for 10 min. Then, the mixture was recovered from ethyl acetate and water. The water phase was acidified with a 1M HCl aqueous solution and extracted twice with ethyl acetate. The combined organic phases were washed with brine, dried over Na<sub>2</sub>SO<sub>4</sub> and concentrated under reduced pressure. The oily crude product

was finally triturated in Et<sub>2</sub>O at 0°C, filtered and dried under vacuum to yield compound **2g** as a white solid (20 mg, 52% yield).

Two rotamers with a ratio 8.5/1.5

**<sup>1</sup>H NMR (500 MHz, CDCl<sub>3</sub>)** δ 7.53 (br. s, 1H), 4.61 – 4.57 and 4.57 – 4.51 (m, 1H), 4.12 and 4.04 (d, *J* = 17.2 Hz, 1H), 4.09 and 4.01 (d, *J* = 17.2 Hz, 1H), 3.75 – 3.54 (m, 2H), 2.39 – 1.86 (m, 4H)

**<sup>13</sup>C NMR (126 MHz, CDCl<sub>3</sub>)** δ 175.2, 174.8, 166.5, 166.2, 59.7, 59.4, 47.5, 47.3, 41.9, 41.8, 31.4, 28.8, 24.9, 22.4

**HRMS (ESI):** [M+H]<sup>+</sup> Calculated for C<sub>7</sub>H<sub>11</sub>ClNO<sub>3</sub>: 192.0422, found 192.0422

**m.p.:** 122.3 – 123.4°C

Data in agreement with literature.<sup>2, 3</sup>

# $^1\text{H}$ and $^{13}\text{C}$ NMR spectra

## N-(2-chloroacetyl)-L-Leucine [688-12-0]

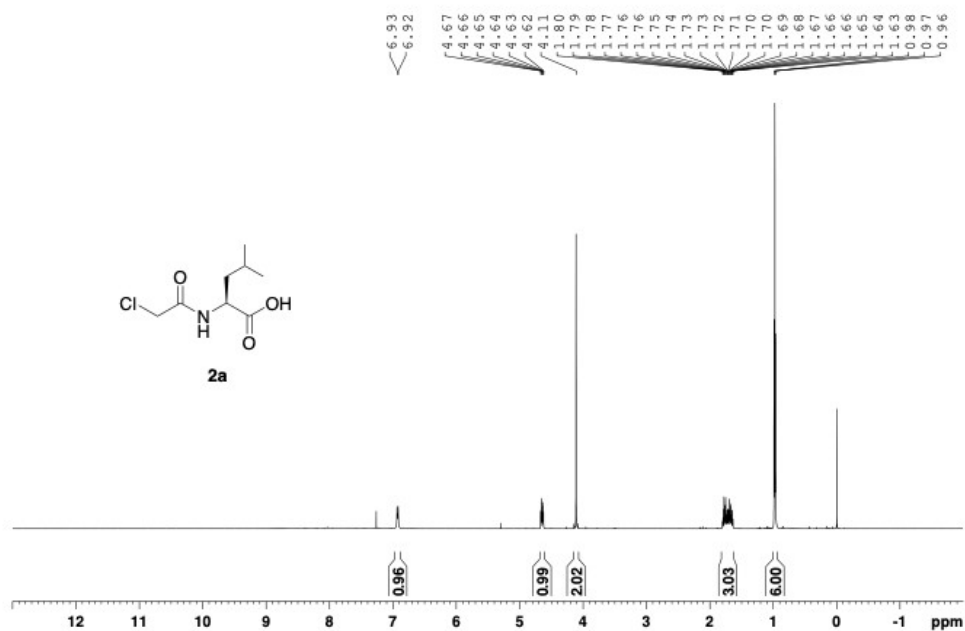

Figure S5 -  $^1\text{H}$  NMR spectrum (500 MHz,  $\text{CDCl}_3$ ) of **2a**

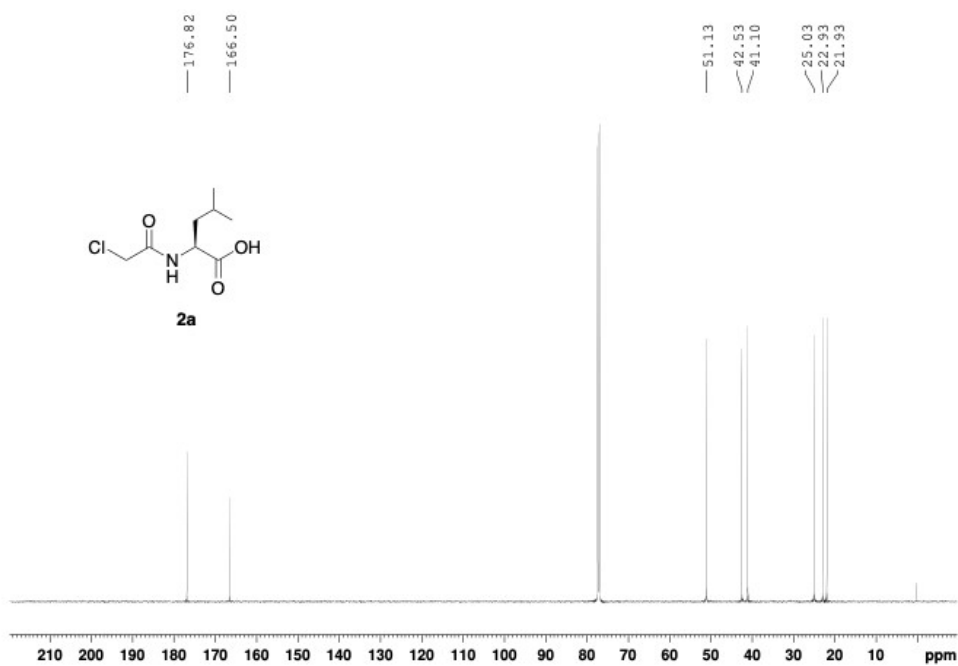

Figure S6 -  $^{13}\text{C}$  NMR spectrum (126 MHz,  $\text{CDCl}_3$ ) of **2a**

# N-(2-chloroacetyl)-L-phenylalanine [721-65-3]

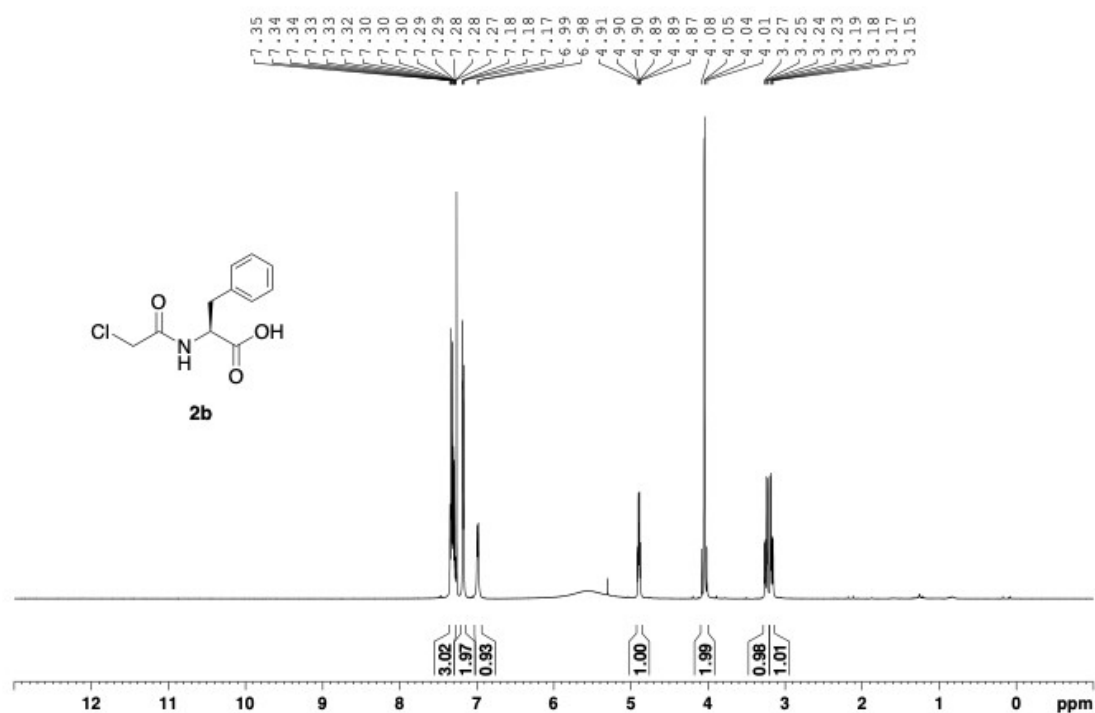

Figure S7 - <sup>1</sup>H NMR spectrum (500MHz, CDCl<sub>3</sub>) of **2b**

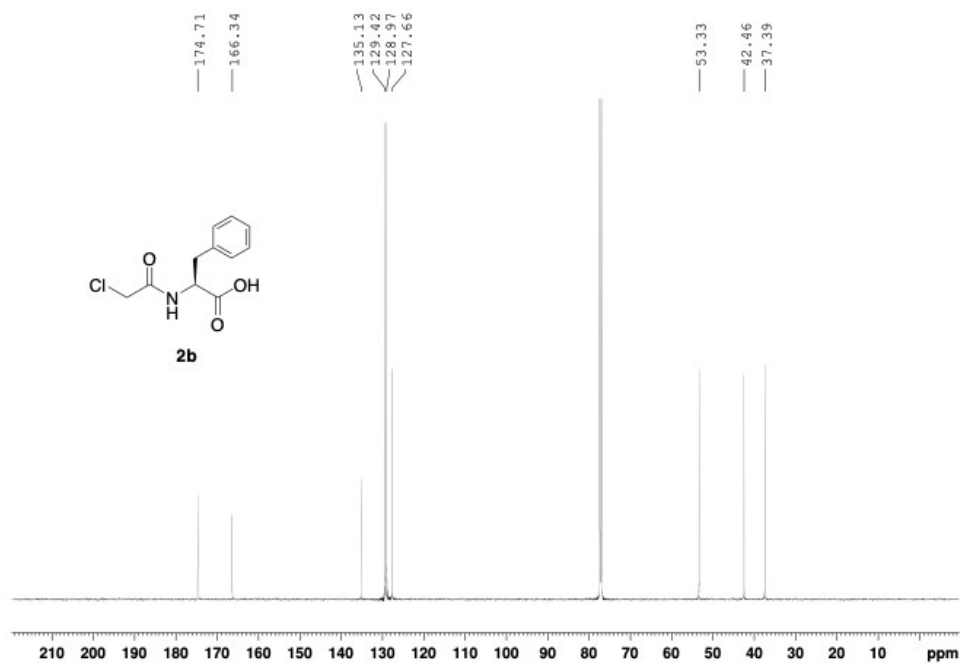

Figure S8 - <sup>13</sup>C NMR spectrum (126MHz, CDCl<sub>3</sub>) of **2b**

# *O*-benzyl-*N*-(2-chloroacetyl)-*L*-serine [3062-02-0]

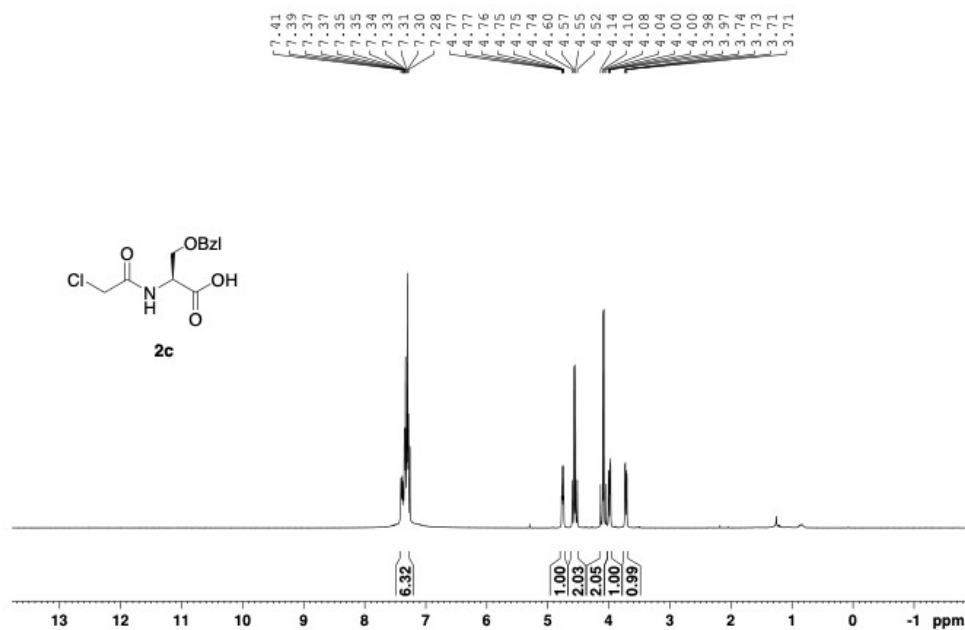

Figure S9 - <sup>1</sup>H NMR spectrum (500MHz, CDCl<sub>3</sub>) of **2c**

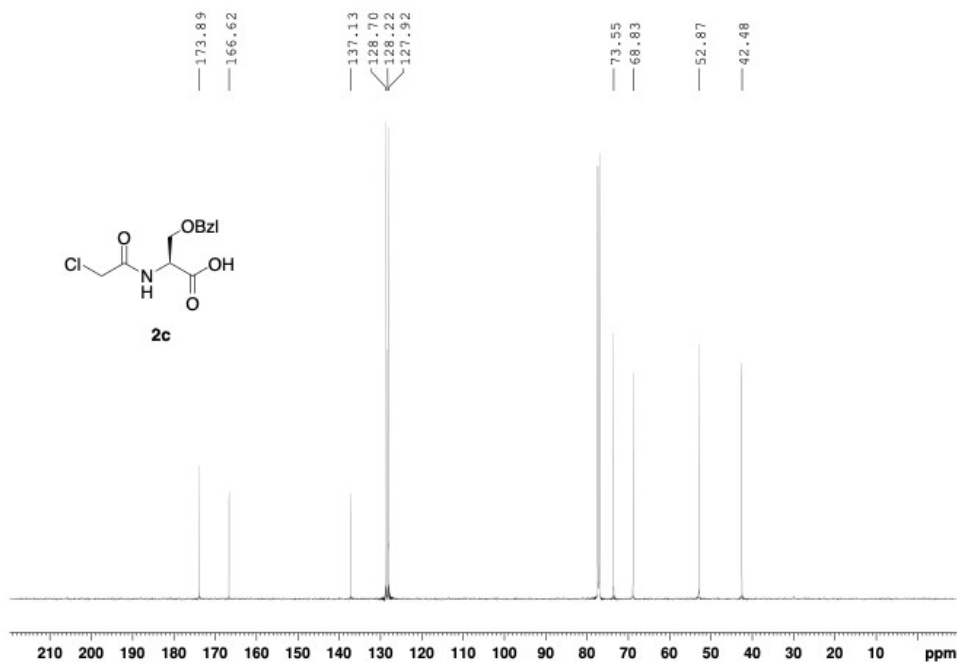

Figure S10 - <sup>13</sup>C NMR spectrum (126MHz, CDCl<sub>3</sub>) of **2c**

*N*<sup>6</sup>-((benzyloxy)carbonyl)-*N*<sup>2</sup>-(2-chloroacetyl)-*L*-lysine [47376-73-8]

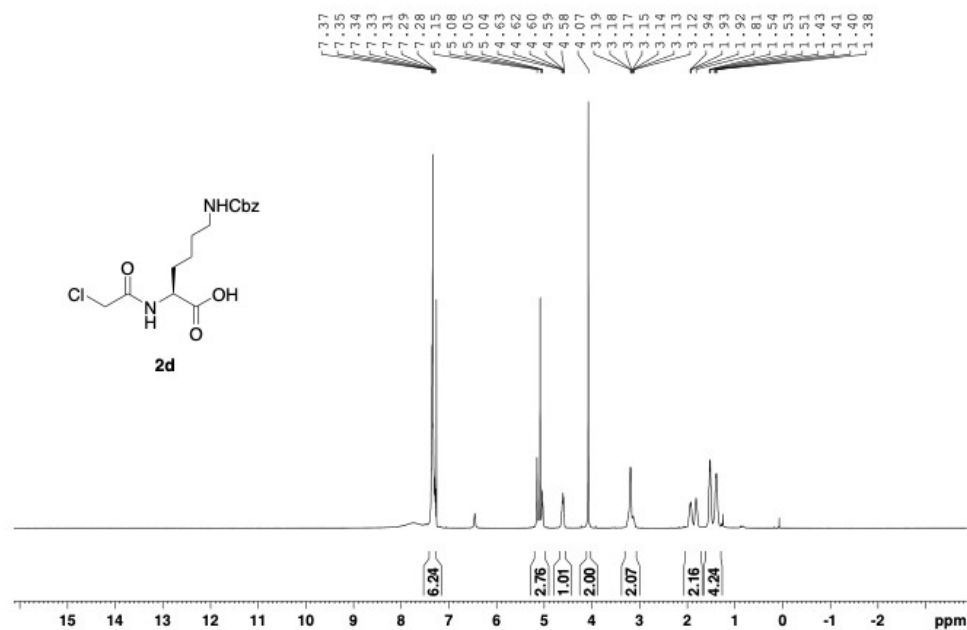

Figure S11 - <sup>1</sup>H NMR spectrum (500MHz, CDCl<sub>3</sub>) of **2d**

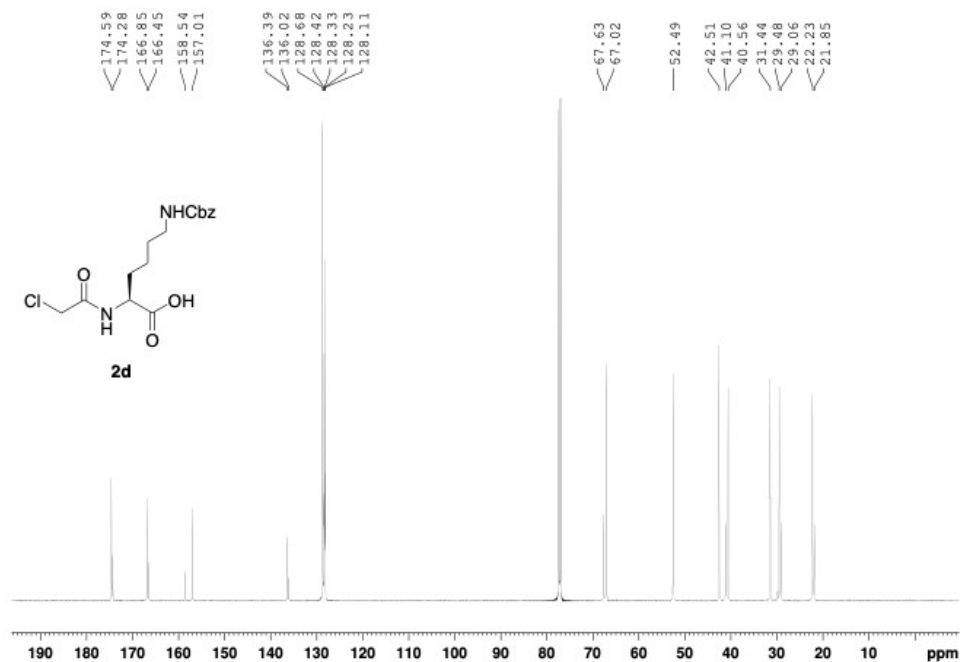

Figure S12 - <sup>13</sup>C NMR spectrum (126MHz, CDCl<sub>3</sub>) of **2d**

(S)-3-(4-(tert-butoxy)phenyl)-2-(2-chloroacetamido)propanoic acid

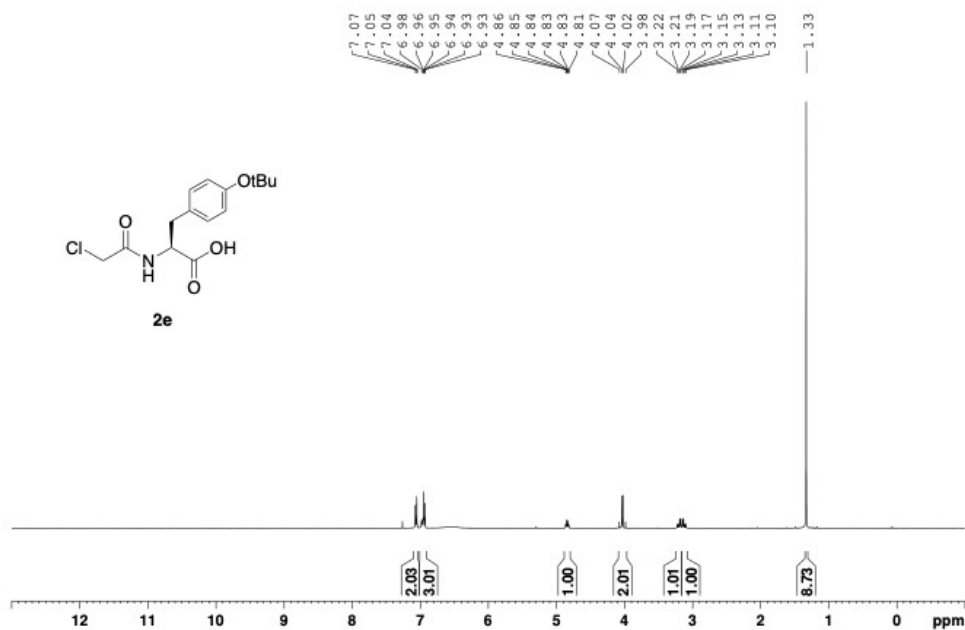

Figure S13 - <sup>1</sup>H NMR spectrum (400MHz, CDCl<sub>3</sub>) of **2e**

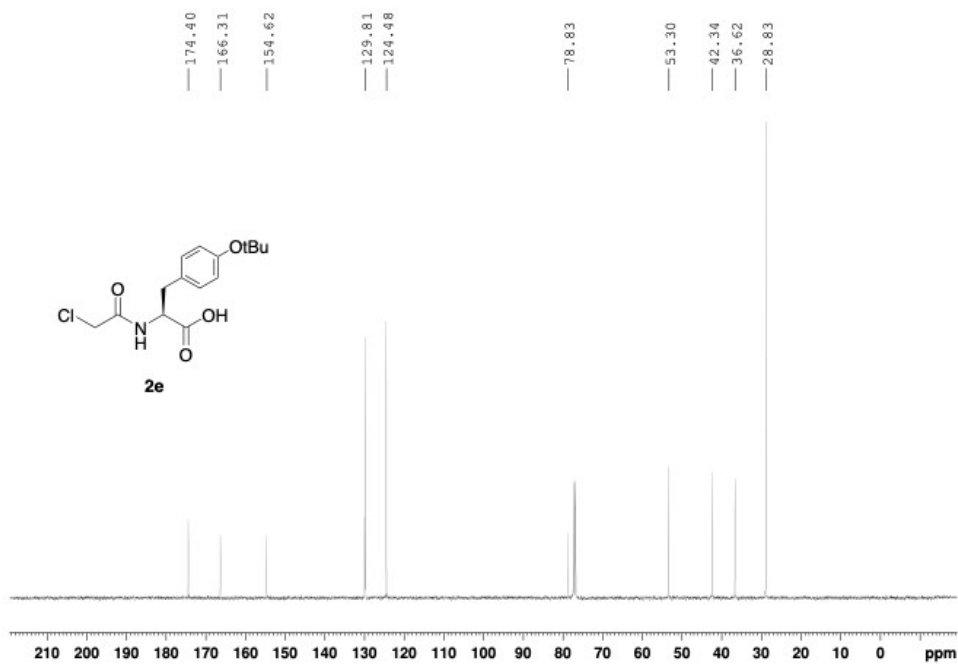

Figure S14 - <sup>13</sup>C NMR spectrum (101MHz, CDCl<sub>3</sub>) of **2e**

(2-chloroacetyl)-*L*-methionine [57230-01-0]

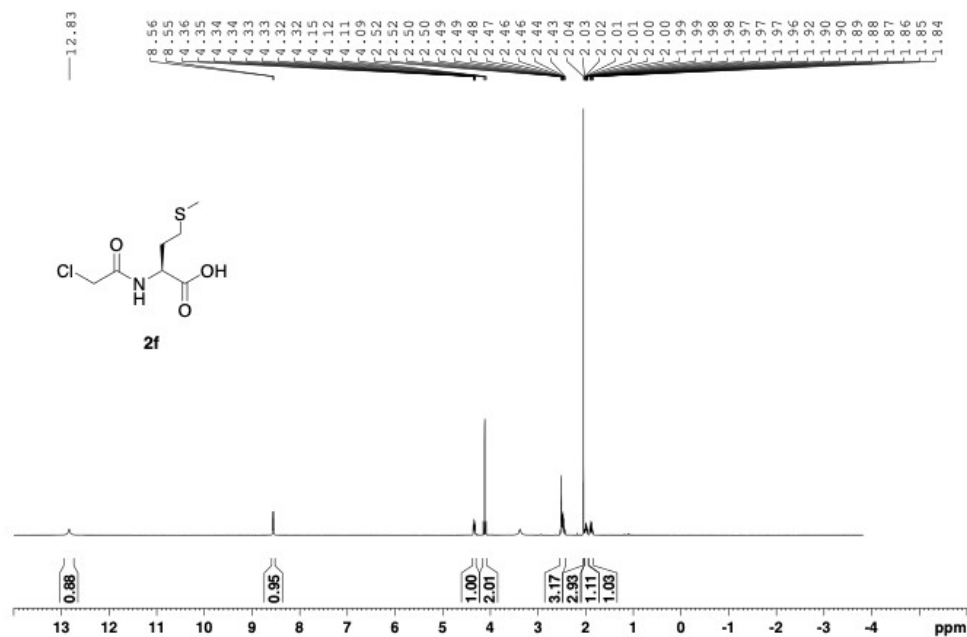

Figure S15 - <sup>1</sup>H NMR spectrum (500MHz, DMSO-*d*<sub>6</sub>) of **2f**

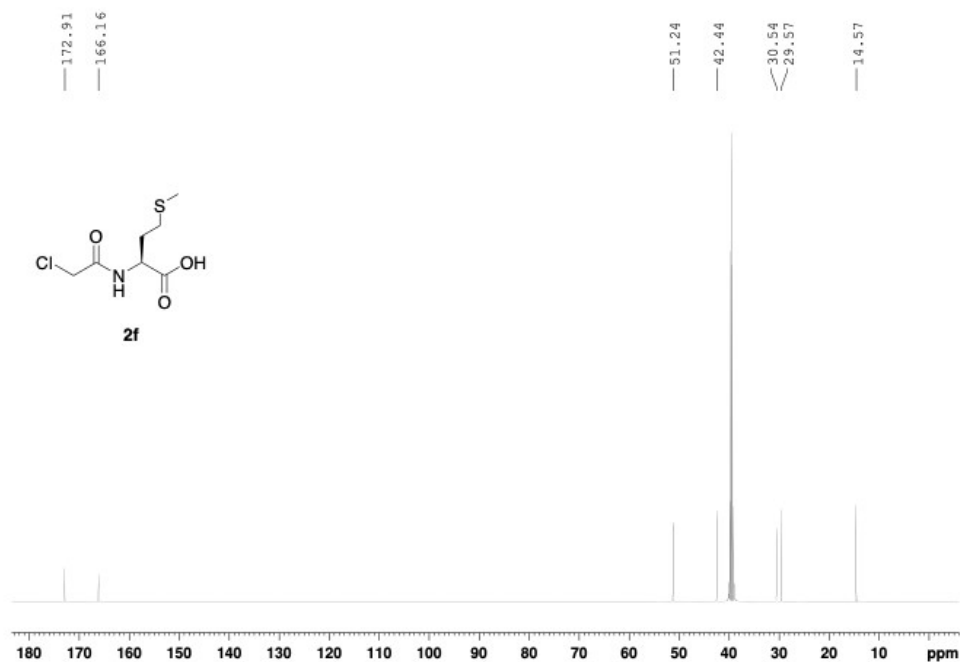

Figure S16 - <sup>13</sup>C NMR spectrum (126MHz, DMSO-*d*<sub>6</sub>) of **2f**

(2-chloroacetyl)-*L*-proline [23500-10-9]

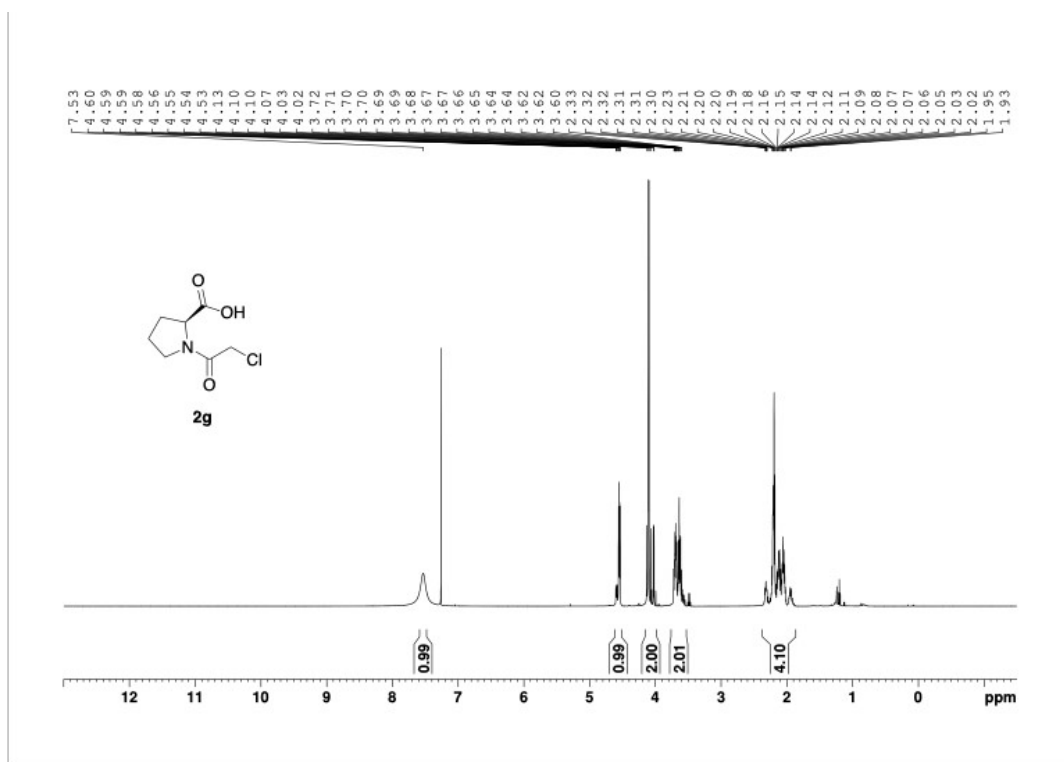

Figure S17 - <sup>1</sup>H NMR spectrum (500MHz, CDCl<sub>3</sub>) of **2g**

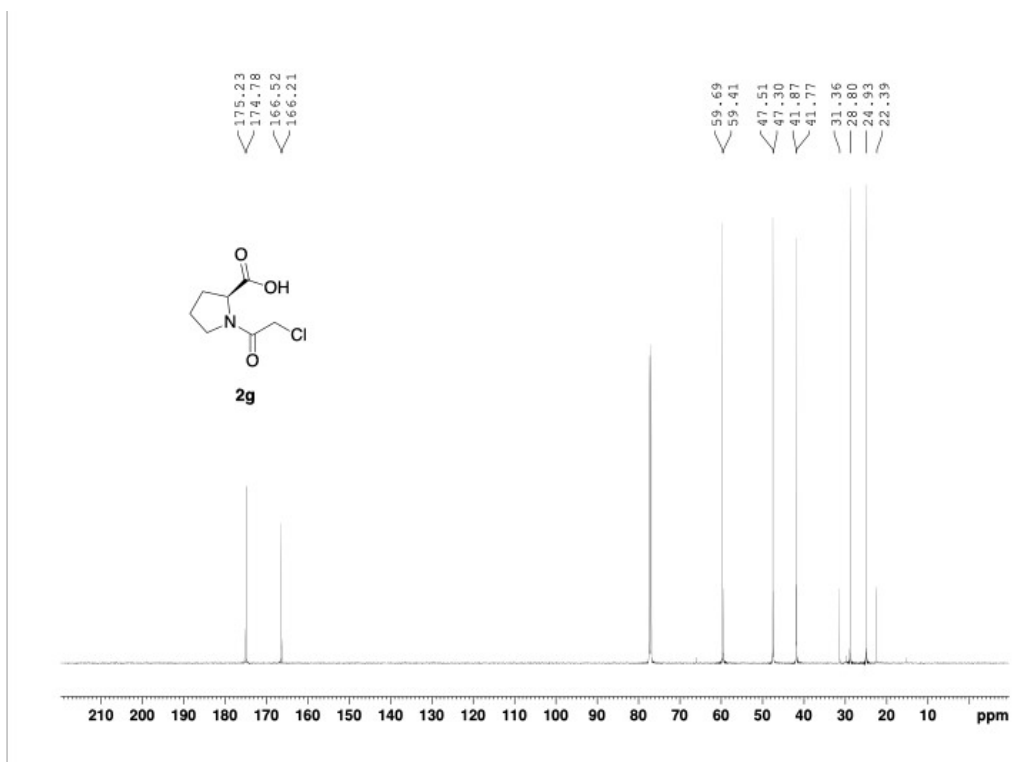

Figure S18 - <sup>13</sup>C NMR spectrum (126MHz, CDCl<sub>3</sub>) of **2g**



## References

1. L. K. Beagle, F. K. Hansen, J.-C. M. Monbaliu, M. P. DesRosiers, A. M. Phillips, C. V. Stevens and A. R. Katritzky, *Synlett*, 2012, **23**, 2337-2340.
2. S. K. Singh, N. Manne and M. Pal, *Beilstein J. Org. Chem.*, 2008, **4**, 20.
3. F. Le Vaillant, M. D. Wodrich and J. Waser, *Chem. Sci.*, 2017, **8**, 1790-1800.
